# Supplementary material for: Whole-genome sequencing reveals genomic signatures associated with the inflammatory microenvironments in Chinese NSCLC patients
Source: PubMed Central journal article supplement (PMC5967326; doi:10.1038/s41467-018-04492-2), 2018-05-24
Supplement: 41467_2018_4492_MOESM1_ESM.pdf [file 41467_2018_4492_MOESM1_ESM.pdf]

**Supplementary information**

**Whole-genome sequencing reveals genomic signatures associated with the inflammatory microenvironments in Chinese NSCLC patients**

**Wang et al.**

## Supplementary Figures

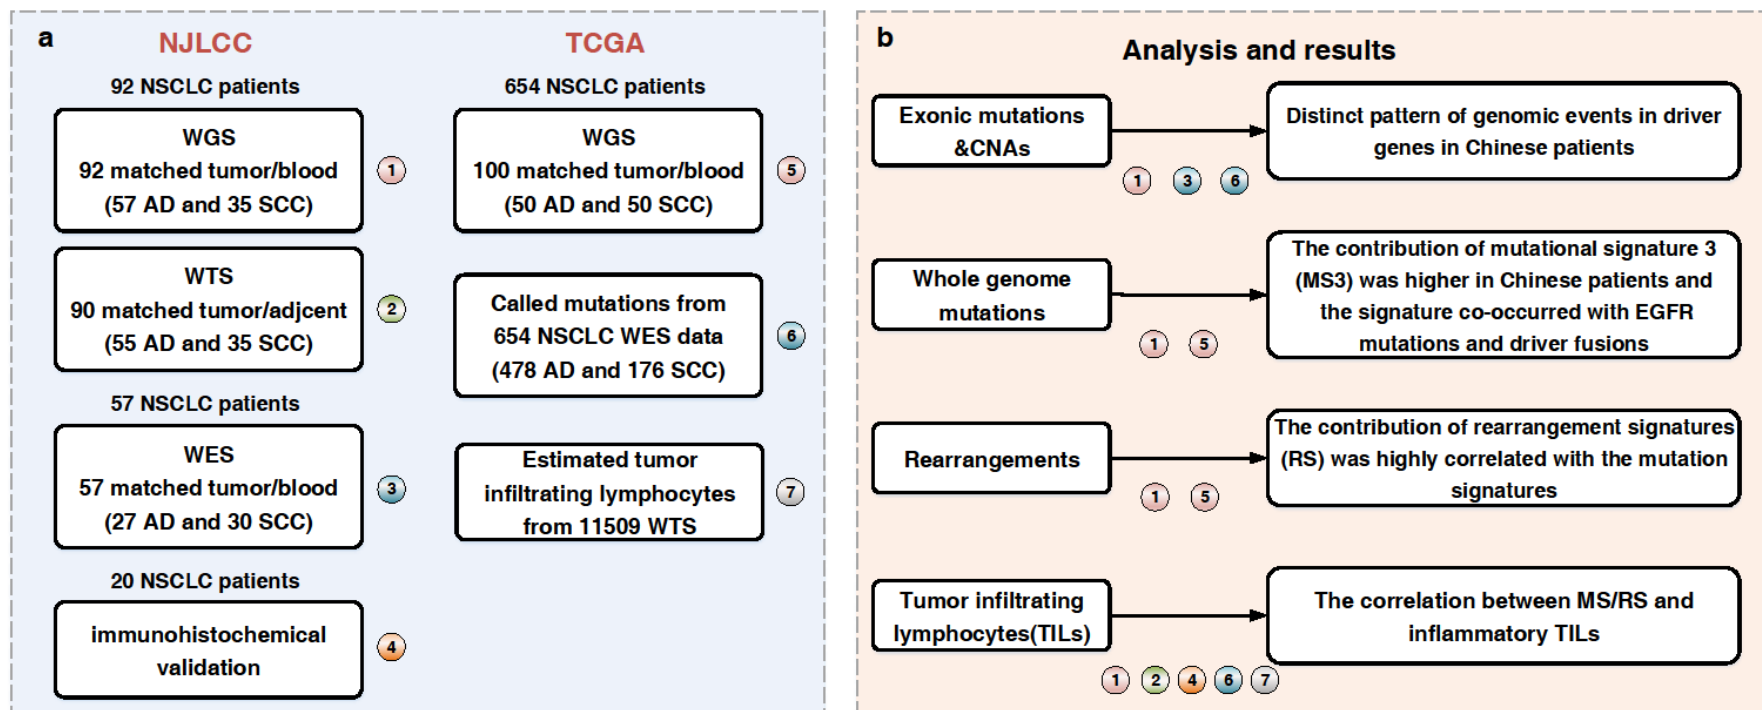

Supplementary Figure 1. General diagram of data and workflow for this study. Whole-genome sequencing of tumor-blood pairs from 92 cases (57 lung AD and 35 lung SCC) was performed. The transcriptome sequences were analyzed in 90 of 92 patients. Additional whole-exome sequencing on 57 pairs (27 lung AD and 30 lung SCC) was used to study exonic mutations. a. The data involved in this study; b. The analysis and results in this study.

**a**

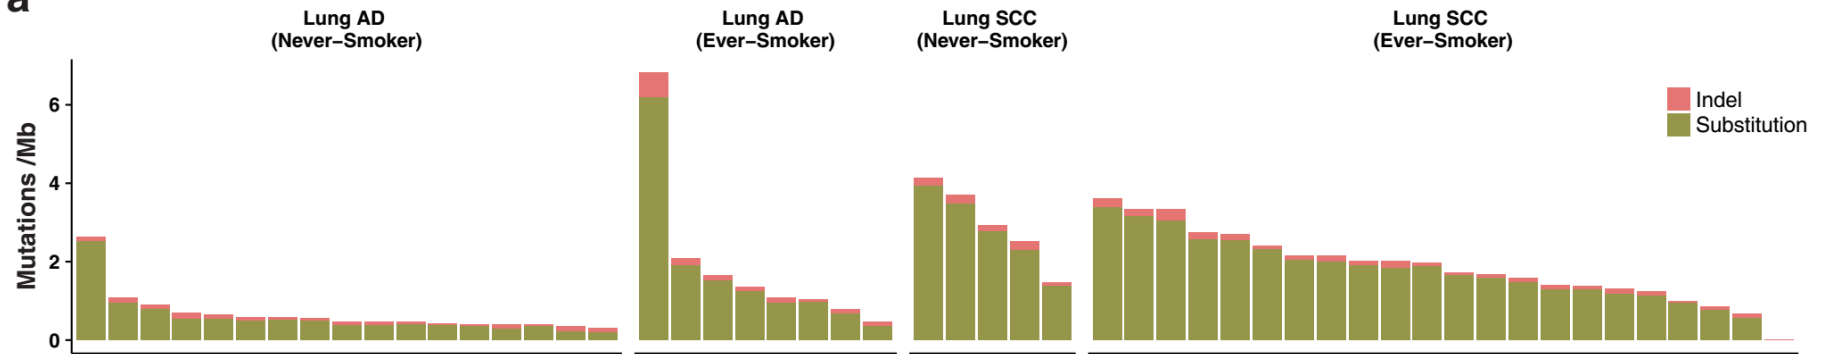

**b**

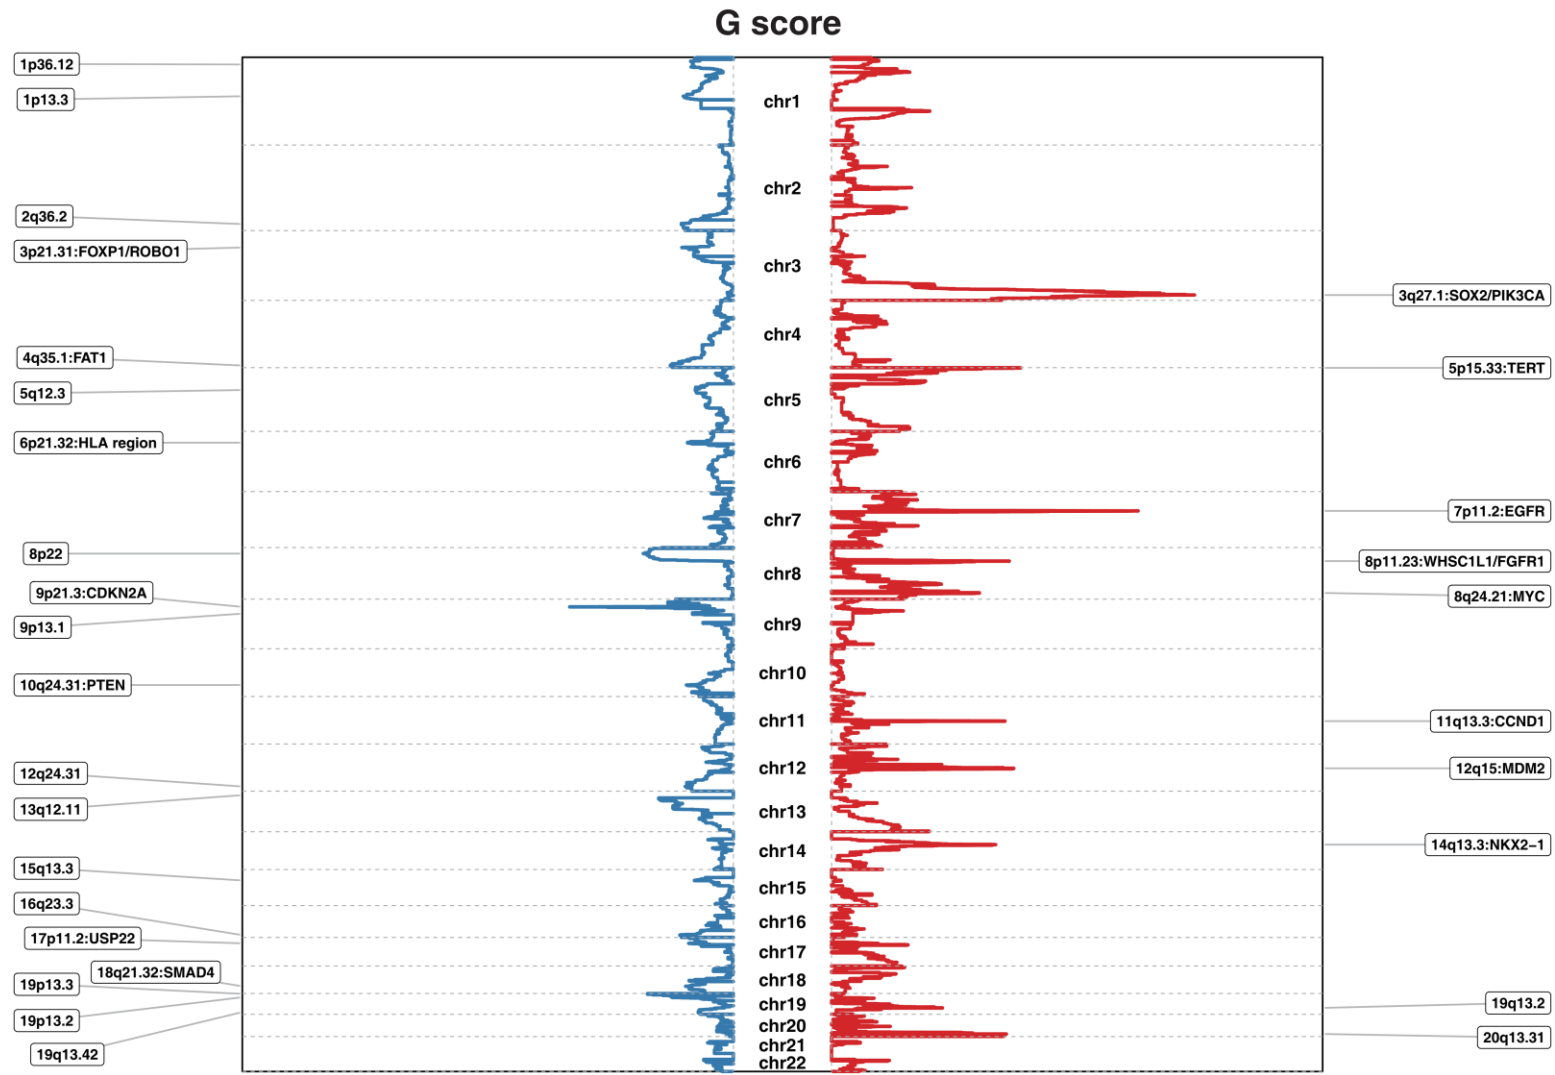

Supplementary Figure 2. a. Mutation (substitutions and indels) rates identified in the whole-exome sequences data from Chinese NSCLC patients; b. Whole genome distribution of copy number alterations identified using whole-genome sequences data. Red indicates amplifications, and blue indicates deletions. The annotated genes were potential driver genes located in the regions with significantly altered copy numbers detected by GISTIC2.

a

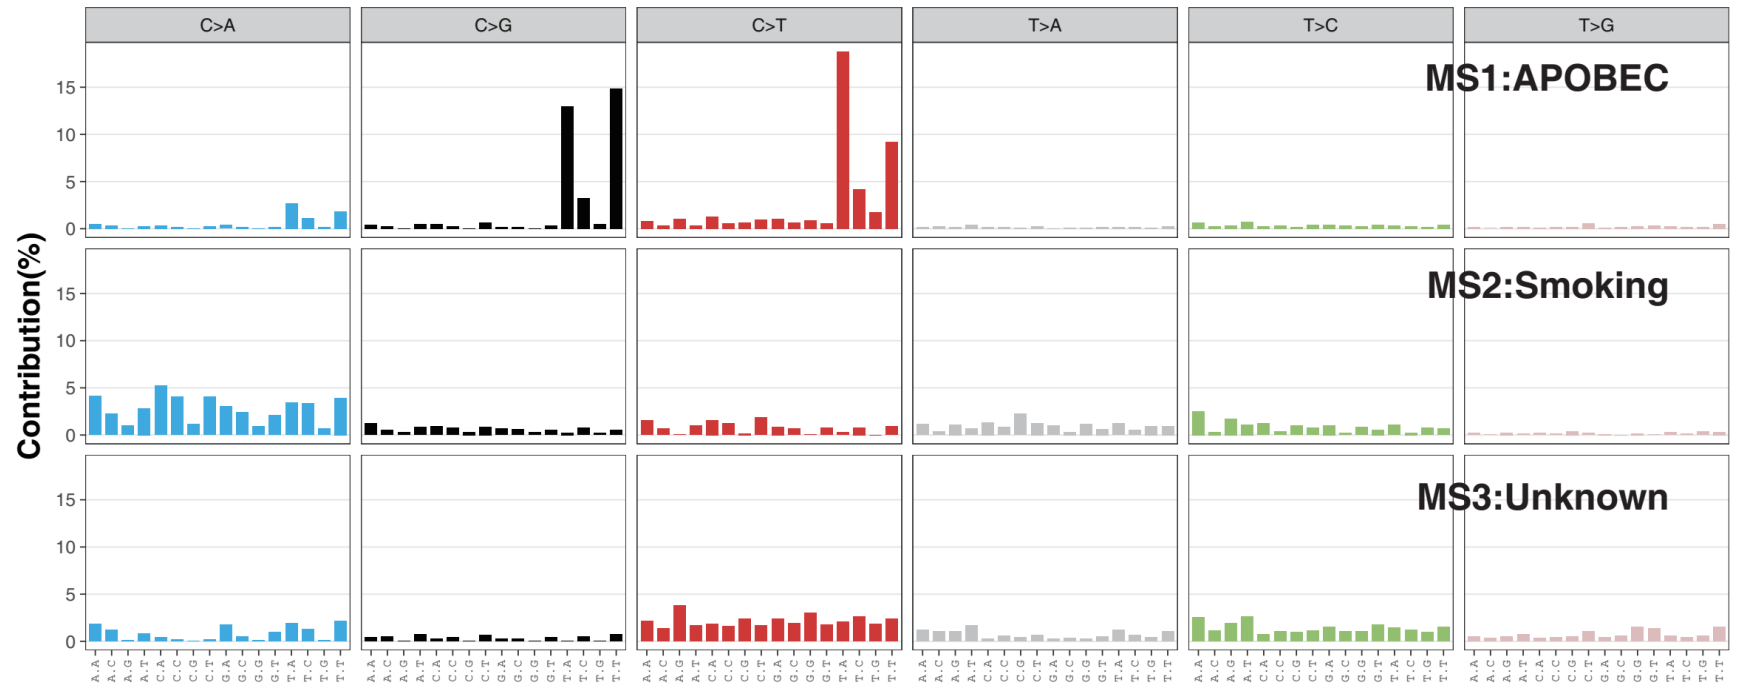

**b**

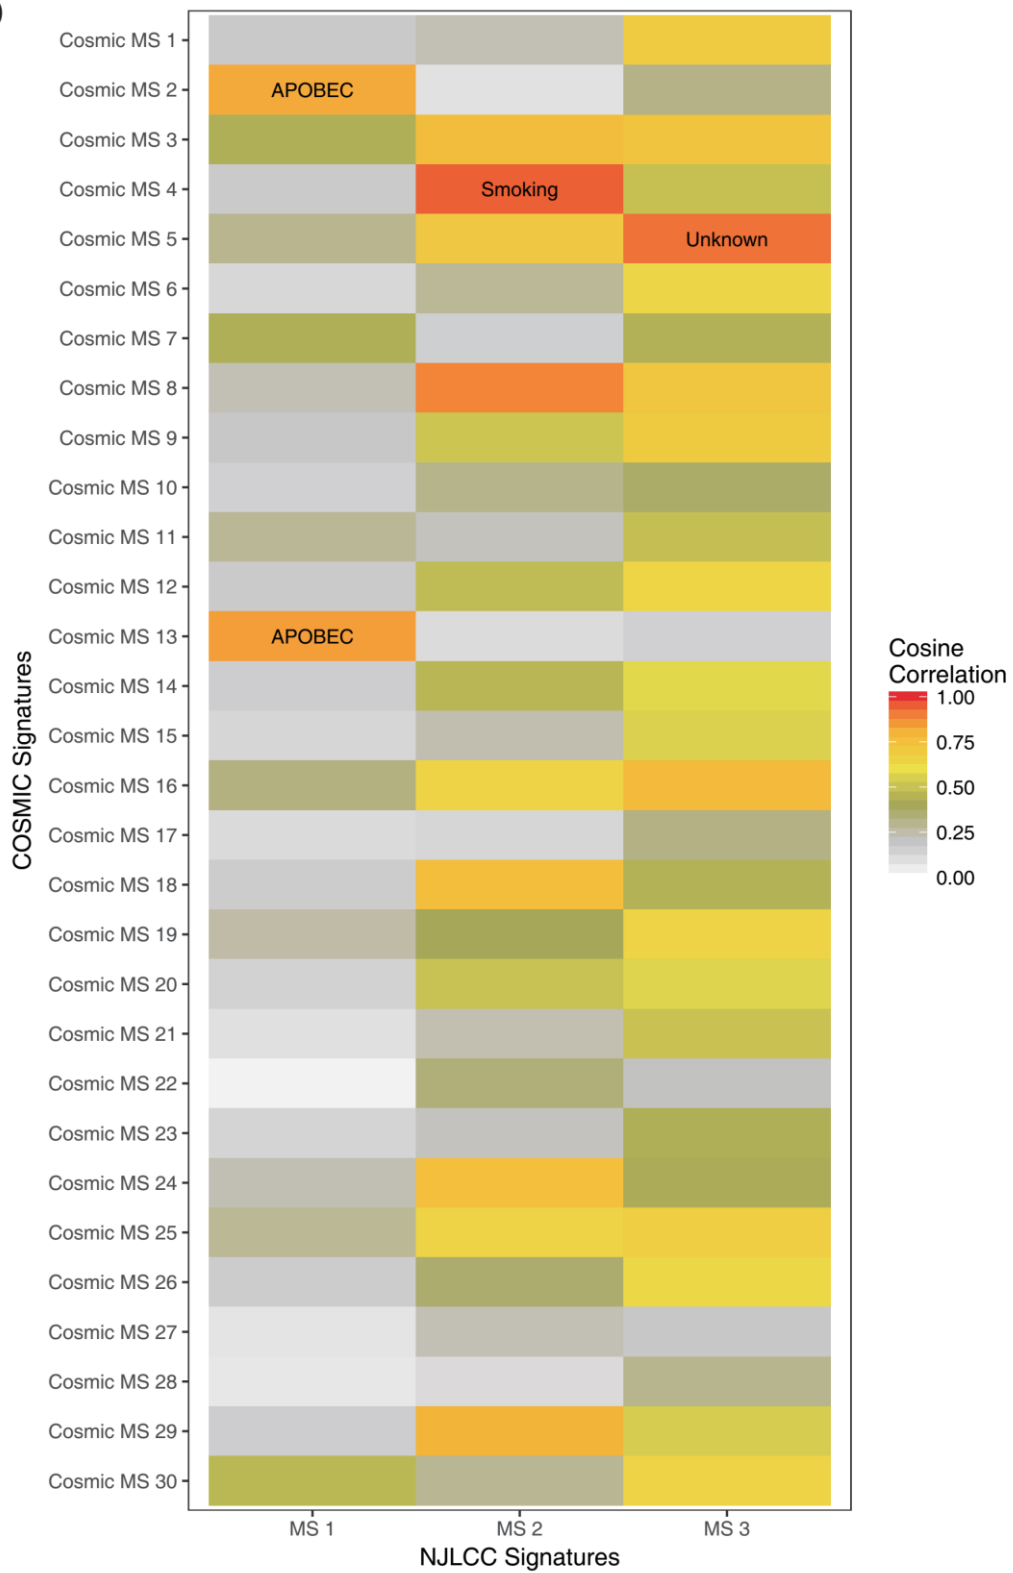

**C**

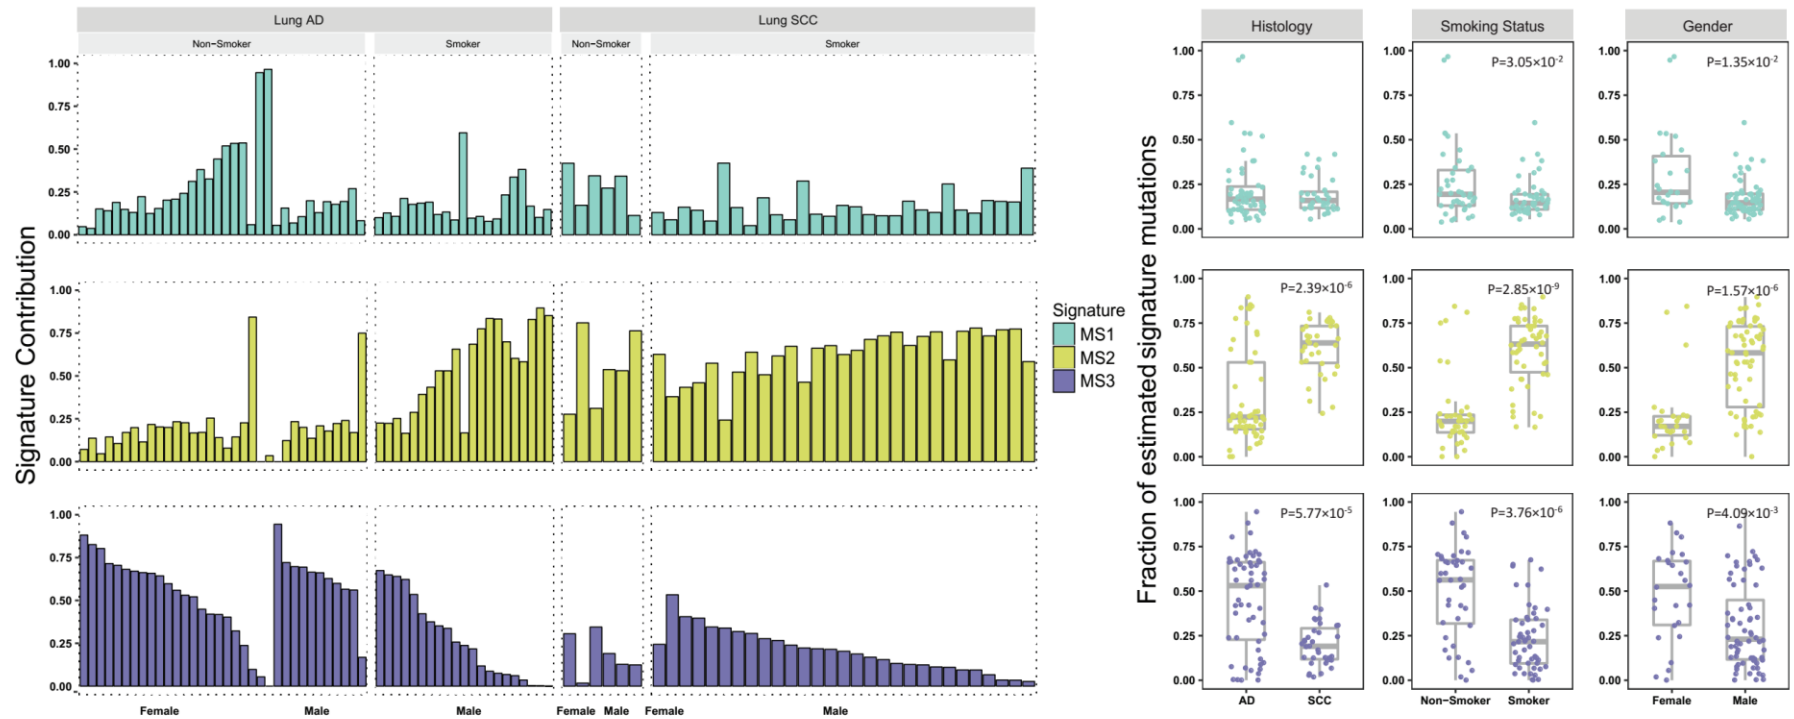

Supplementary Figure 3. a. Three mutational signatures identified in our patients; b. Correlation between the mutational signatures derived from the NJLCC patients and previously defined signatures from COSMIC. A pair-wise cosine correlation was performed between the COSMIC and NJLCC signatures. The top one or two most correlated COSMIC signatures were used to determine the identity of each NJLCC signature, and



each NJLCC signature was renamed accordingly. c. Contribution of each NJLCC signature in all samples and their associations with histology, smoking status and gender. The Wilcoxon rank sum test was used to evaluate the differences.

**a**

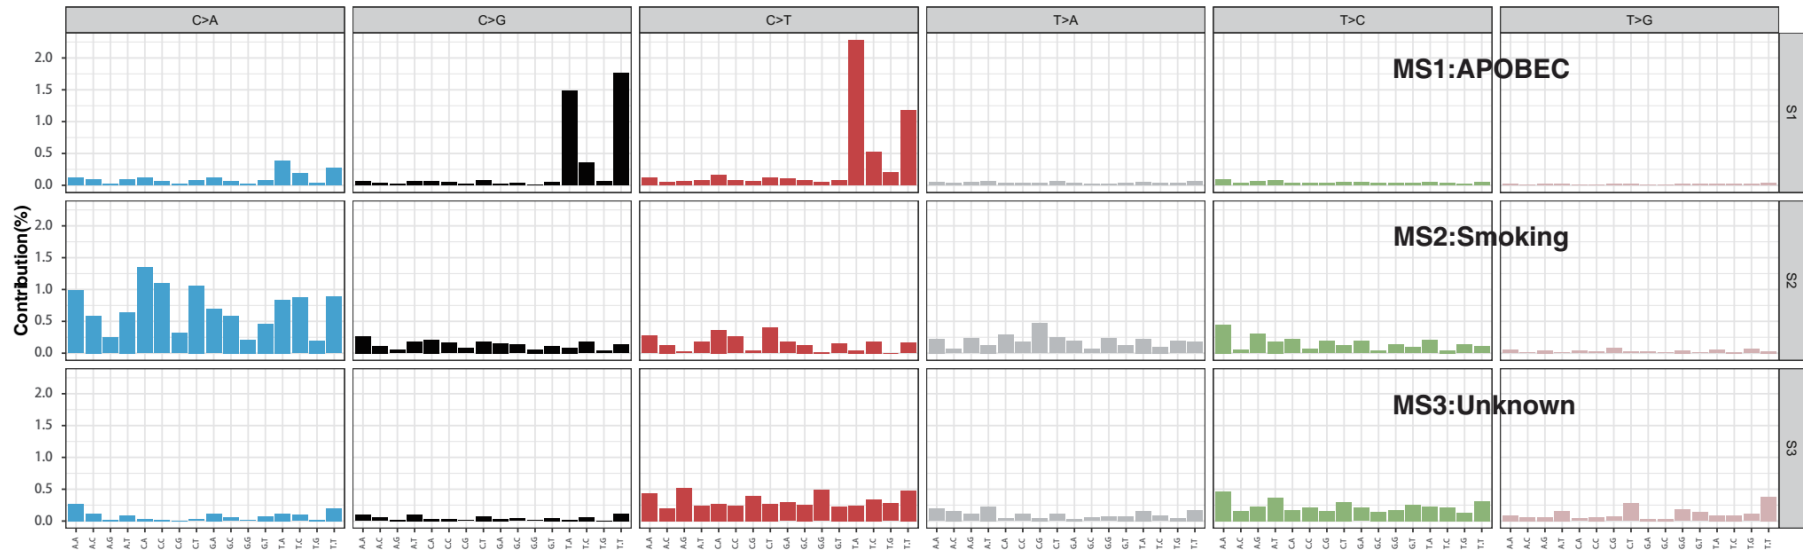

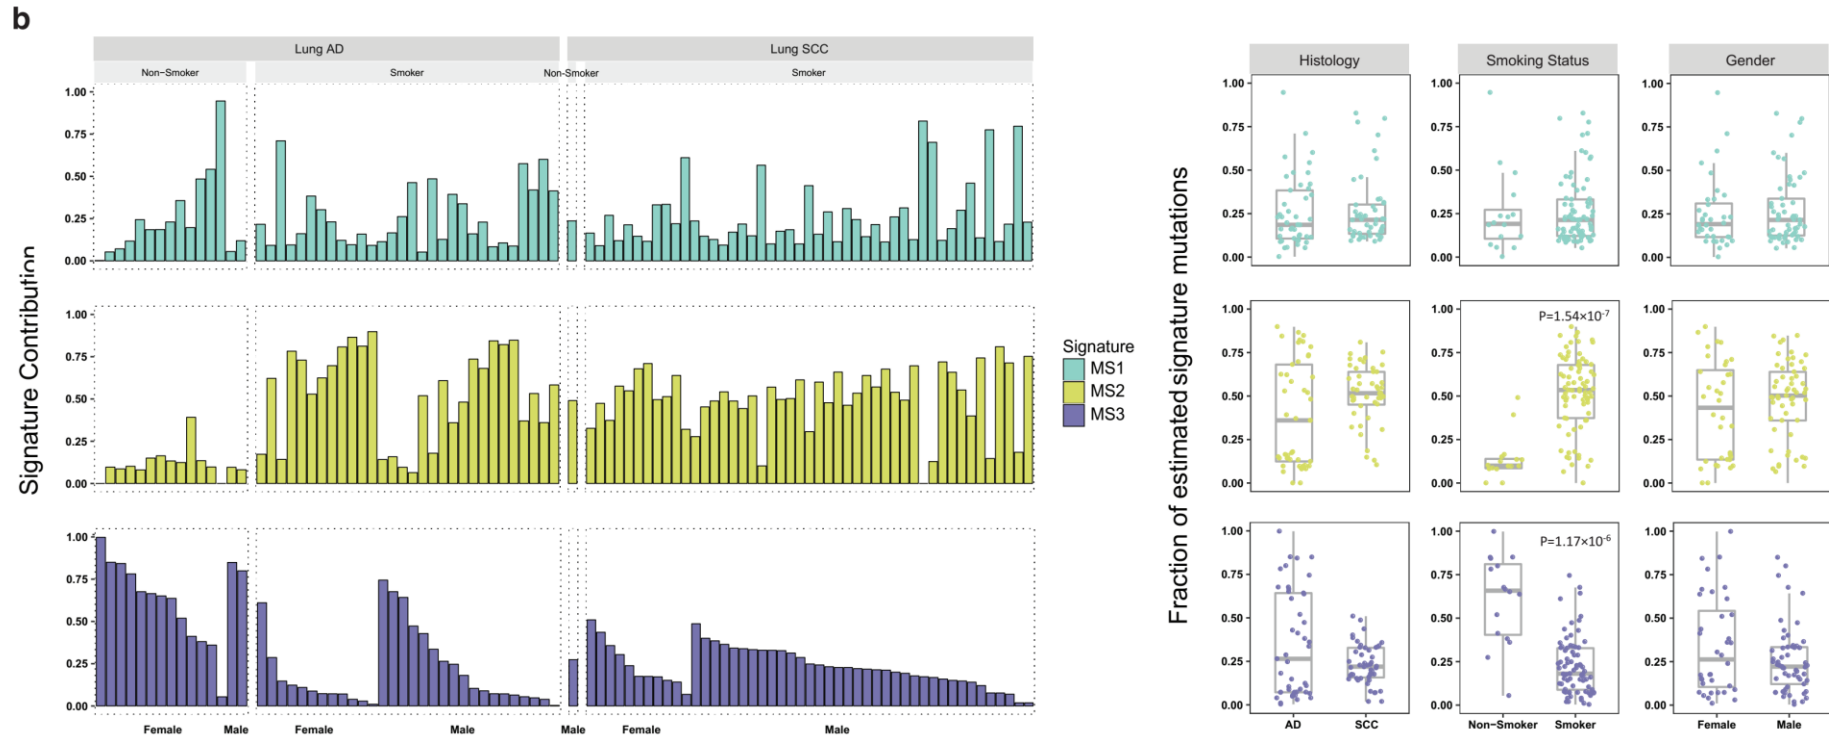

Supplementary Figure 4. a. Three similar mutational signatures extracted from whole-genome sequencing data from 100 TCGA NSCLC patients. b. Contribution of each TCGA NSCLC signature in all samples and their associations with histology, smoking status and gender. The Wilcoxon rank sum test was used to evaluate the differences.

a

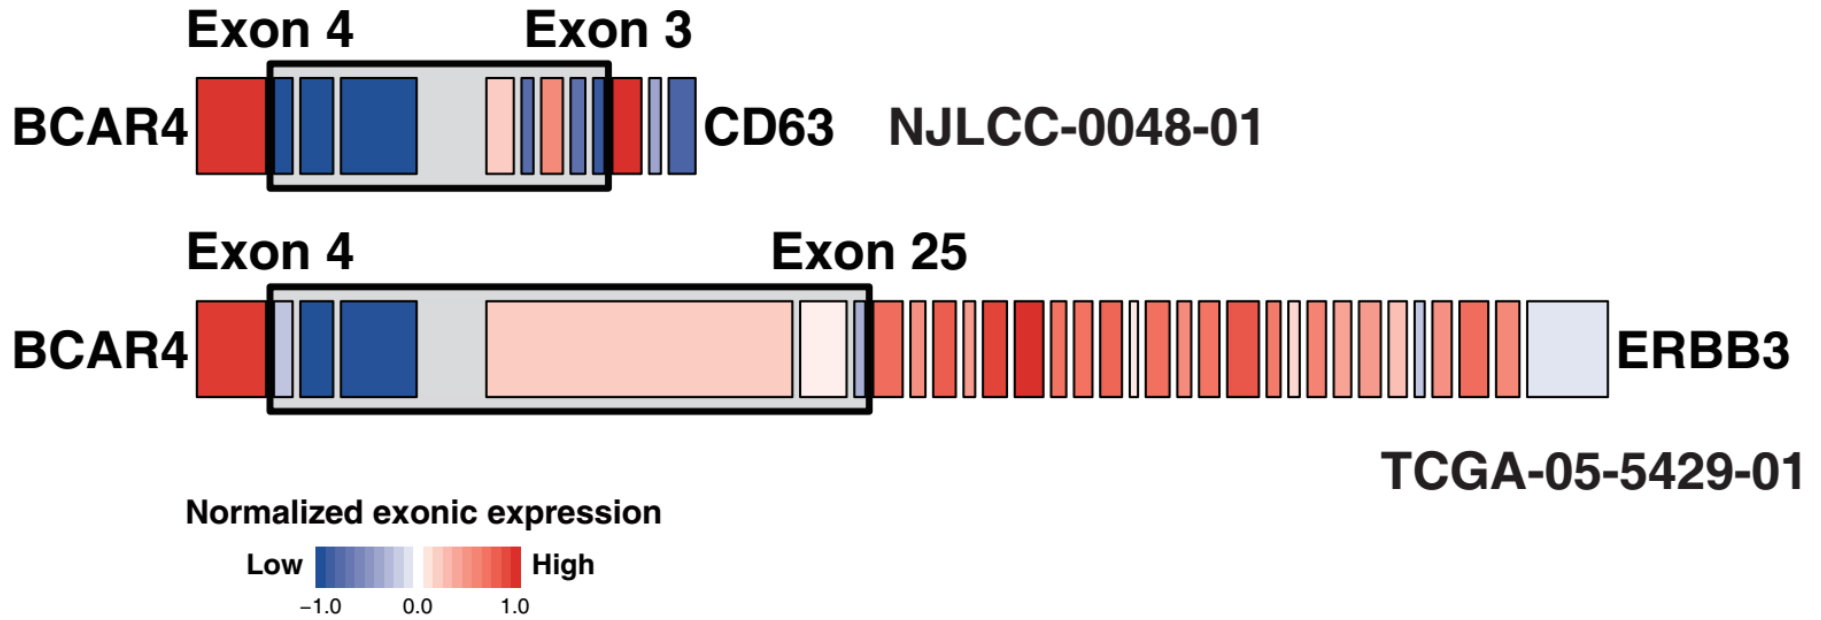

**b**

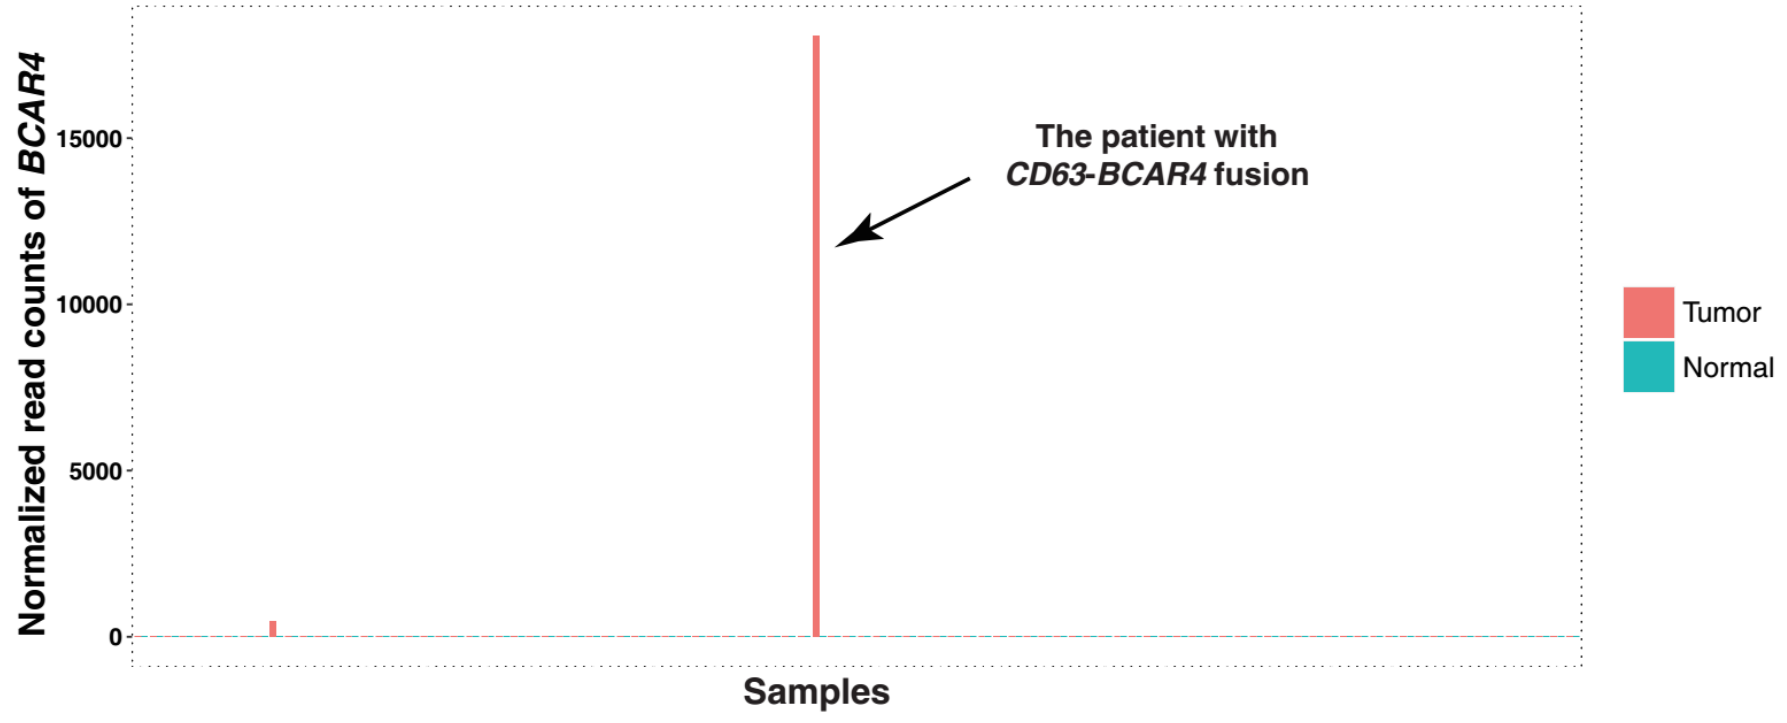

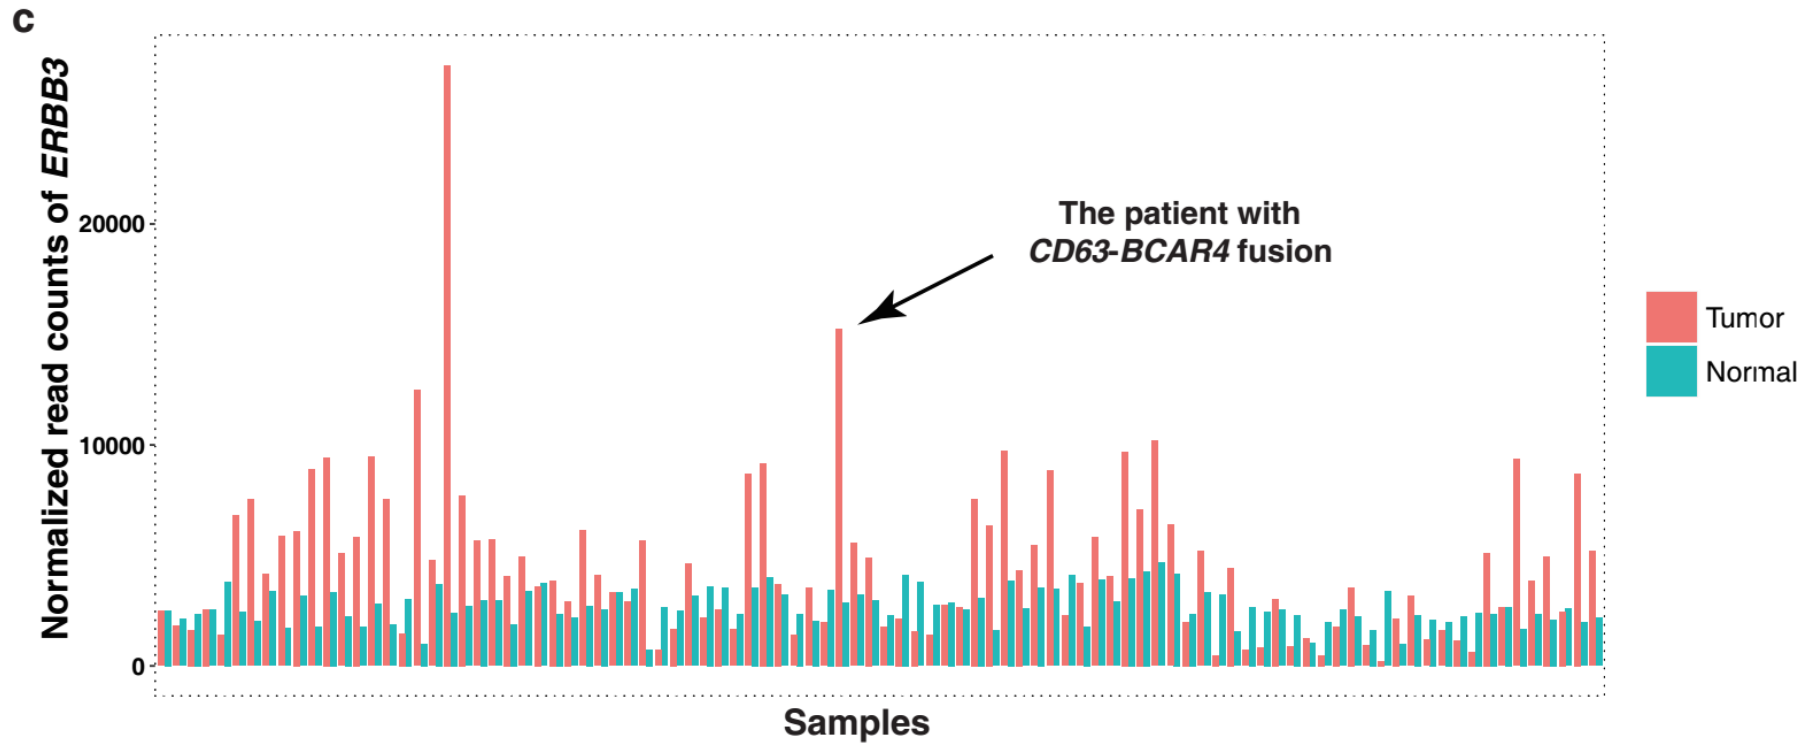

Supplementary Figure 5. a. The fusions involving *BCAR4* occurred in one our patient and one TCGA patient. The expression of exons retained in the putative fusion transcript was relatively higher than the expression of exons not in the putative fusion transcript (as indicated by the gray box). b. The expression of *BCAR4* was highly activated in our patient. c. The expression of *ERBB3* was highly activated in our patient.

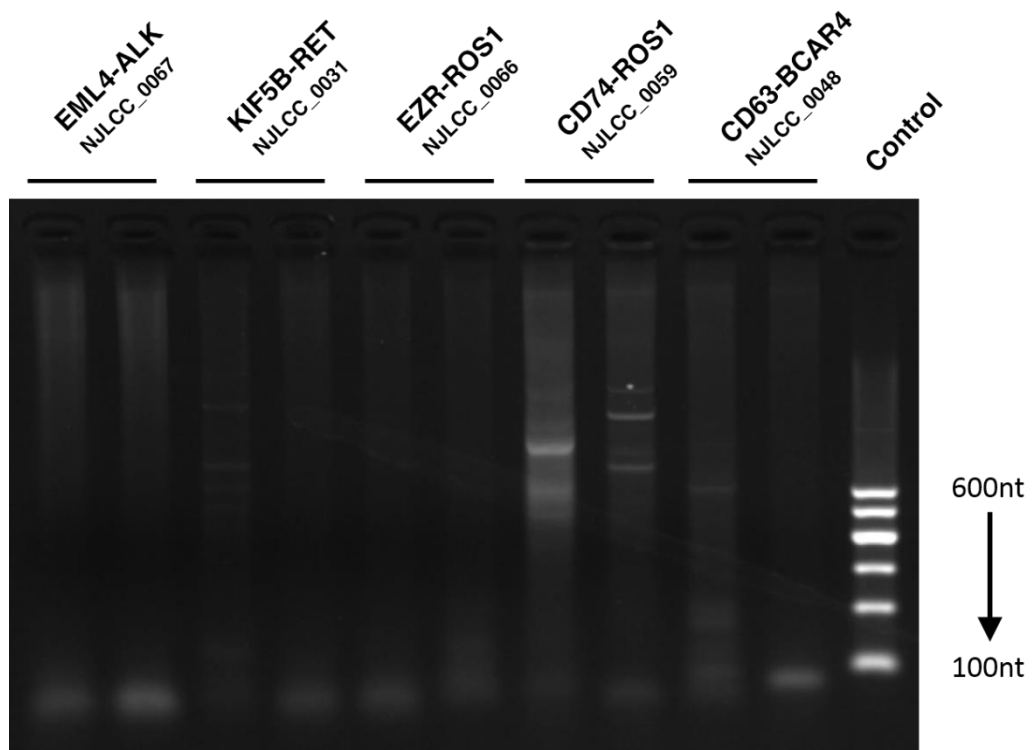

Supplementary Figure 6. Electrophoretogram of rearrangements PCR products in adjacent normal tissues

**a**

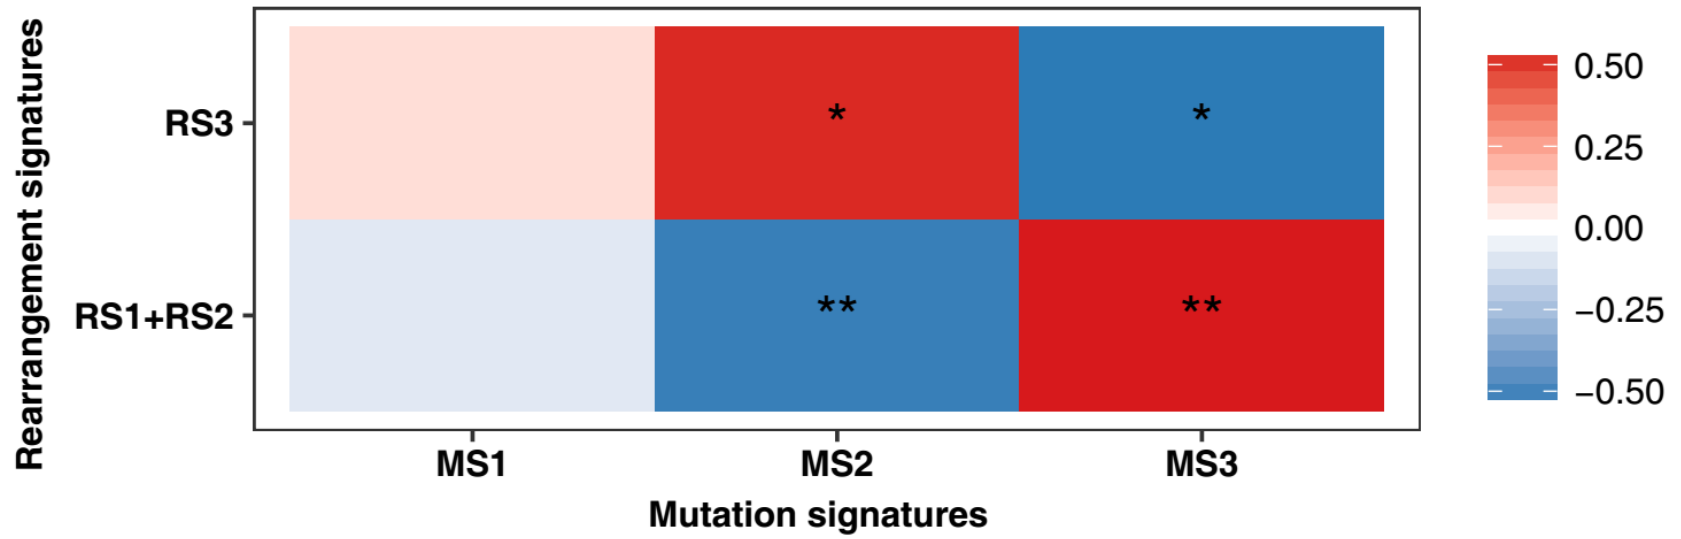



**b**

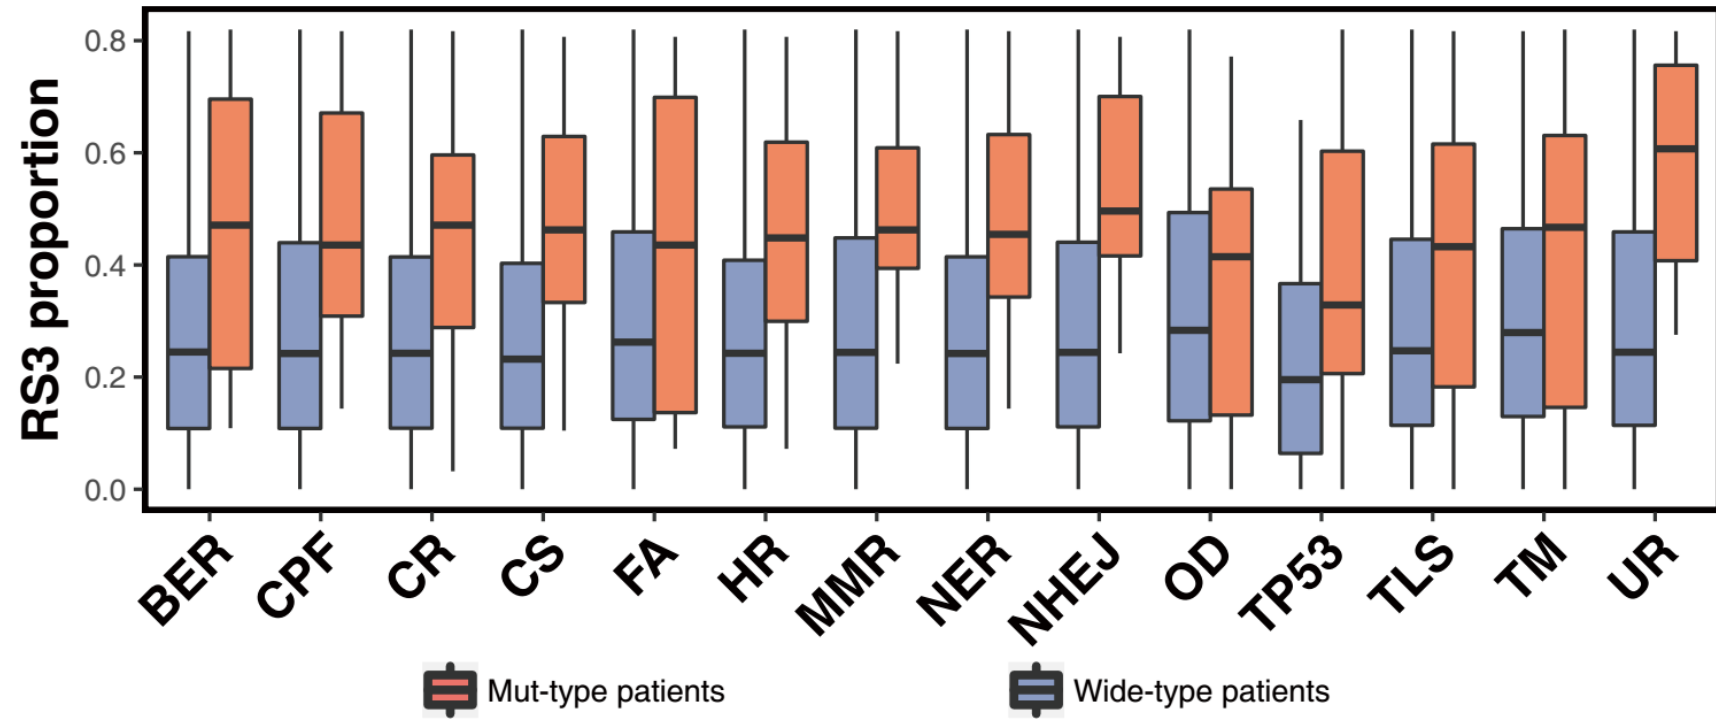

**C**

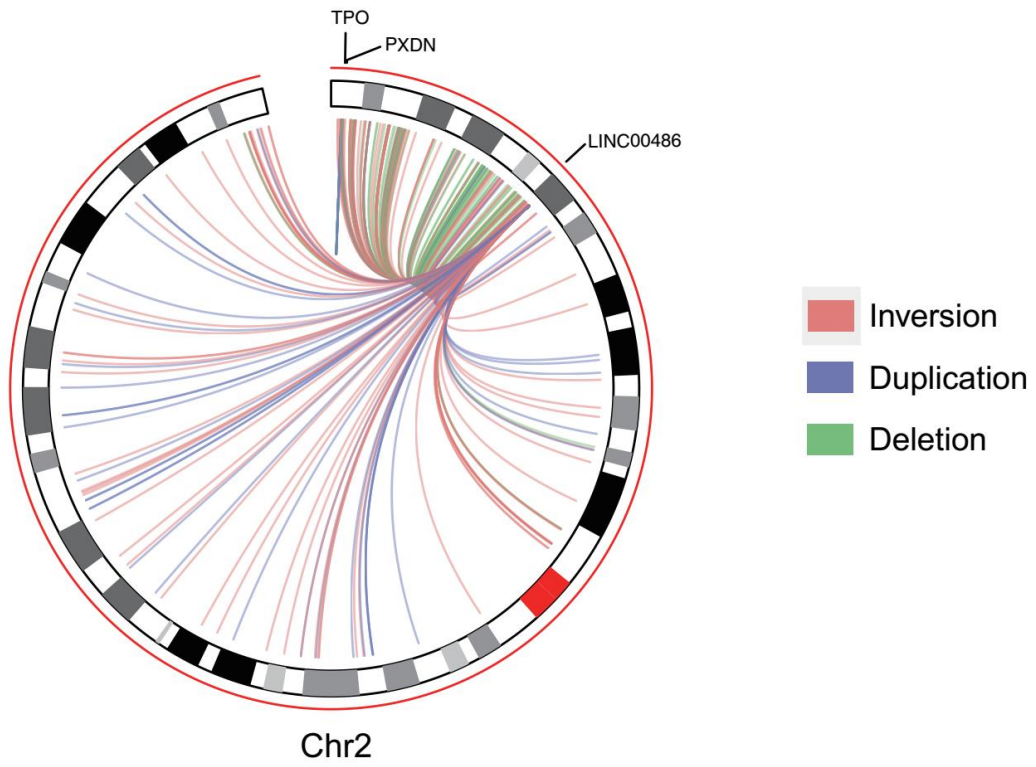

Supplementary Figure 7. a. Correlation matrix between the NJLCC rearrangement signatures and the NJLCC mutational signatures. \*\*\*:  $P < 0.001$ ; \*\*:  $P < 0.01$ ; \*:  $P < 0.05$ ; b. Association between mutations in the sub-pathways and the RS3 rearrangement proportion (AM, alternative mechanism for telomere maintenance; BER, base excision repair; CPF, checkpoint factor; CR, chromatin remodeling; CS, chromosome segregation; FA, Fanconi anemia pathway; HR, homologous recombination; MMR, mismatch repair; NER, nucleotide excision repair; NHEJ, nonhomologous end joining; OD, other double-strand break repair; TLS, translesion synthesis; TM, telomere maintenance; UR, ubiquitylation response). c. Two new potential fragile sites with hyper-rearrangements in NSCLC patients.

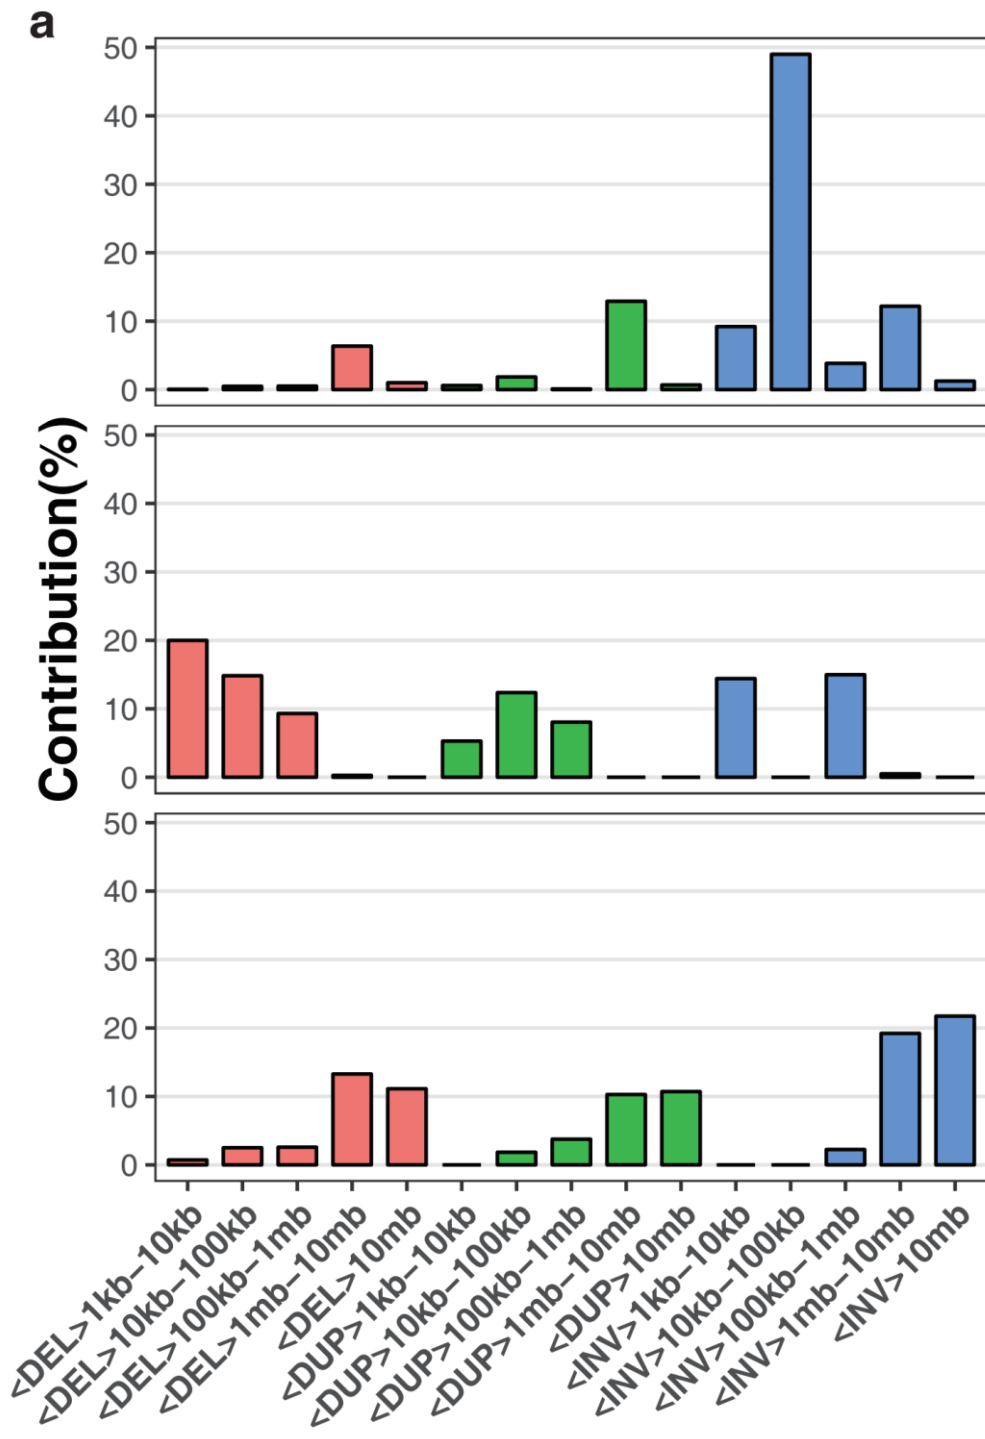

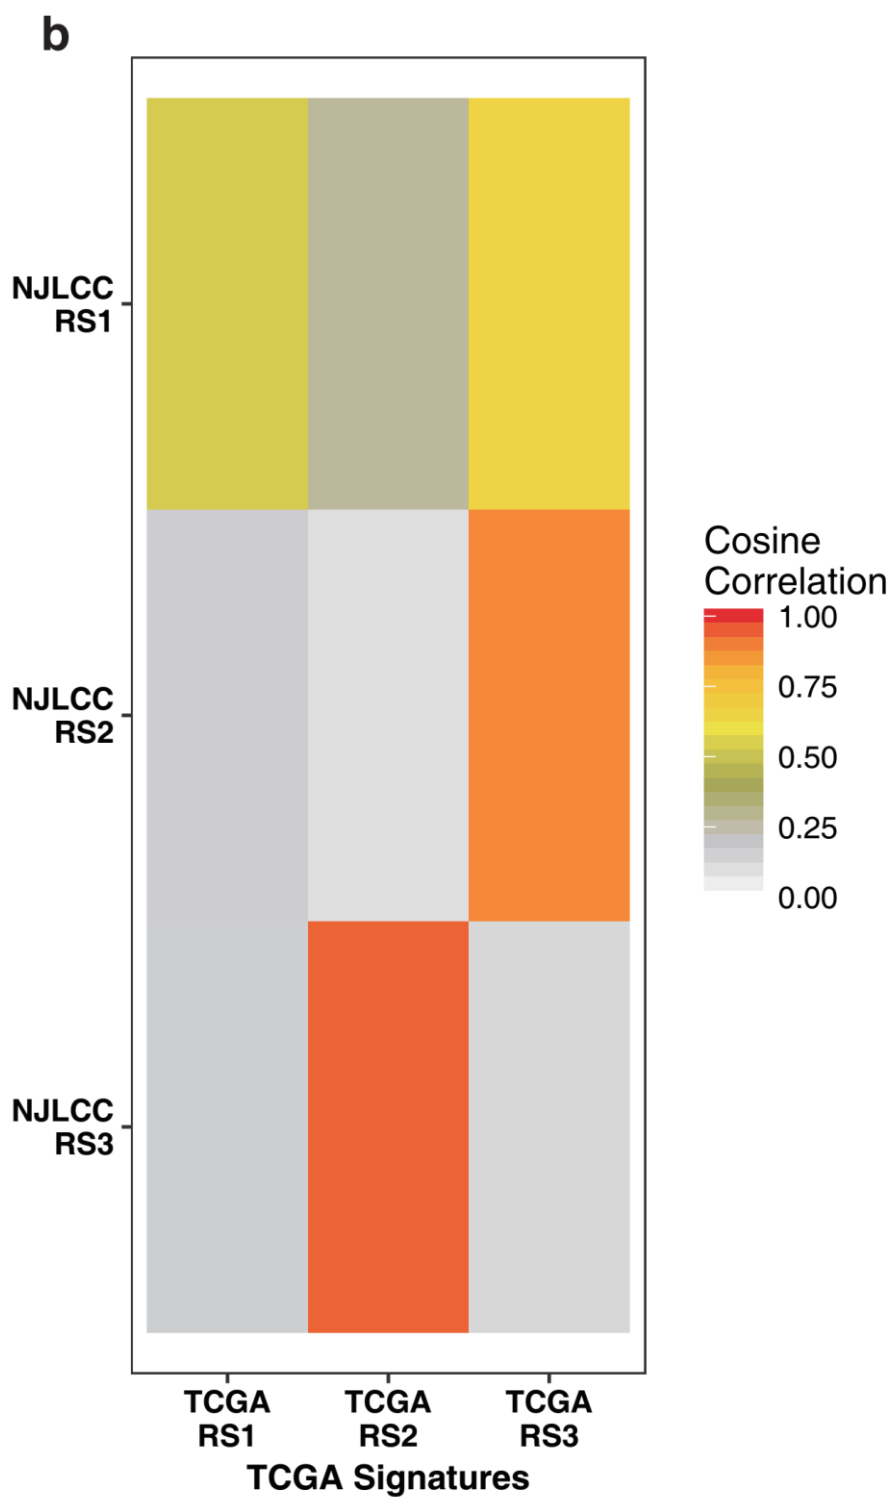

Supplementary Figure 8. a. Three rearrangement signatures extracted from whole-genome sequencing data from 100 TCGA NSCLC patients. b. Correlation between NJLCC rearrangement signatures and TCGA rearrangement signatures.

**a**

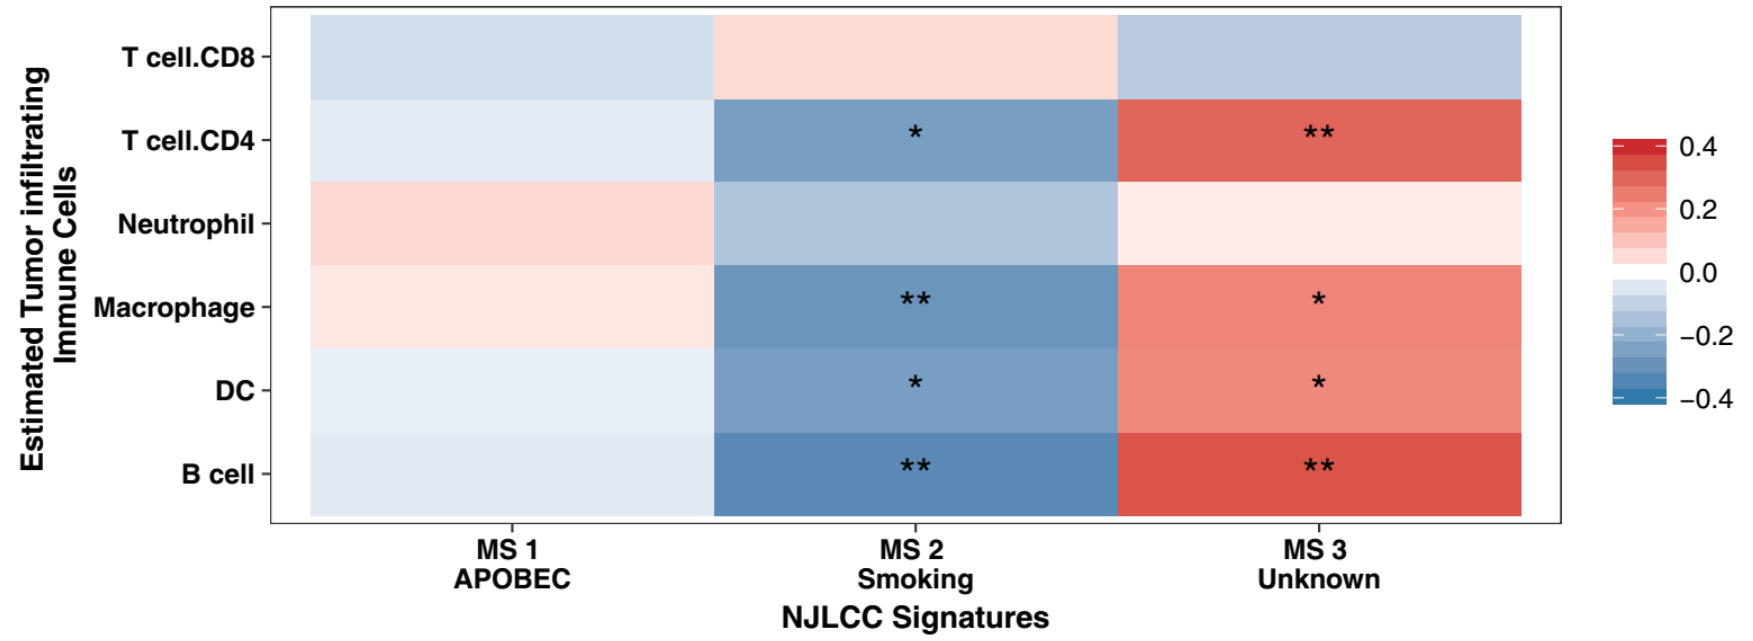

**b**

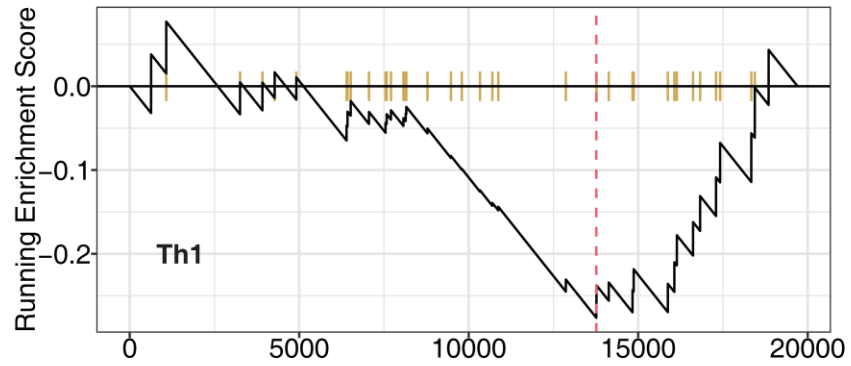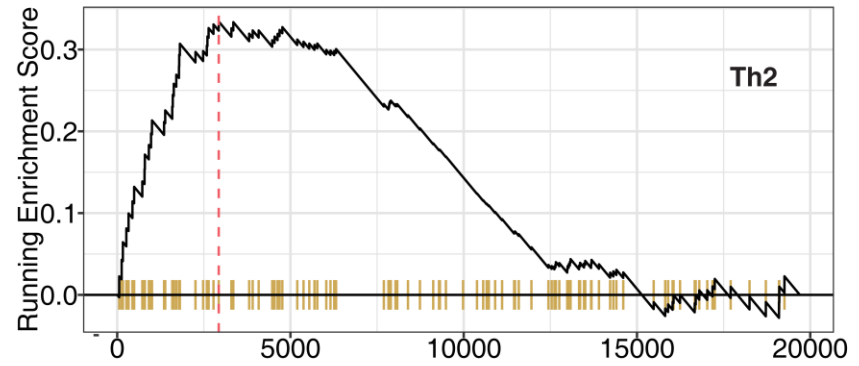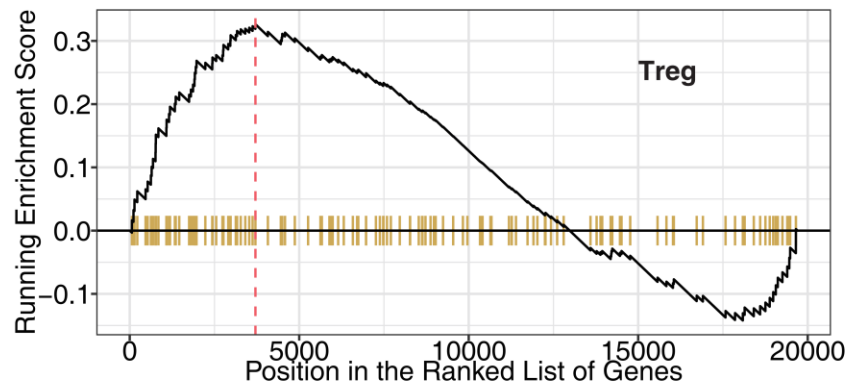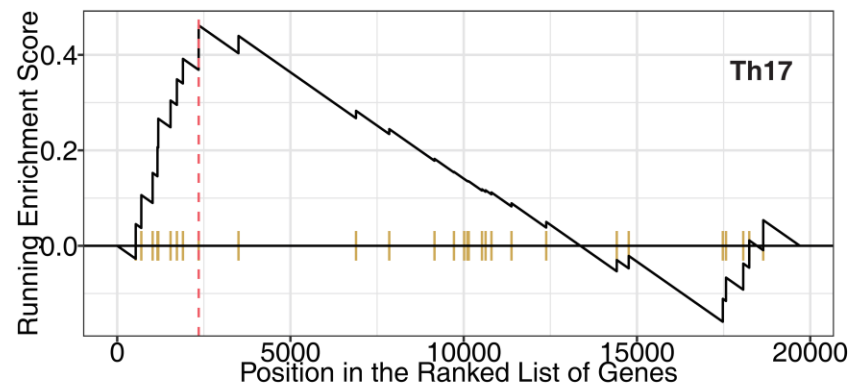

**C**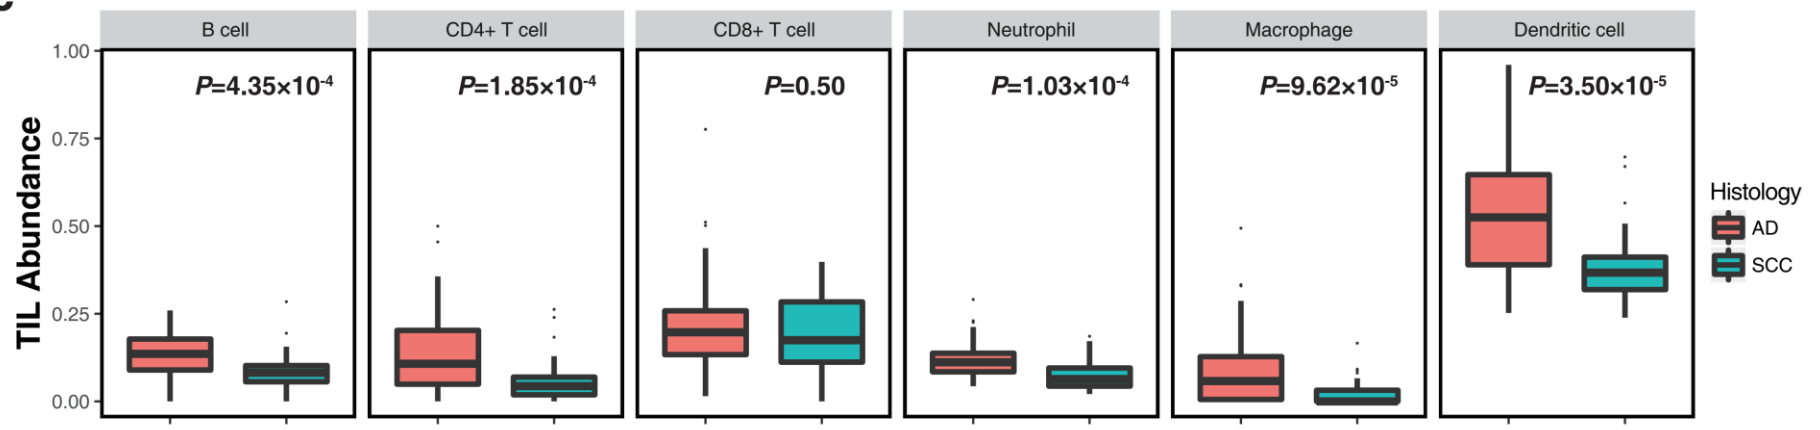



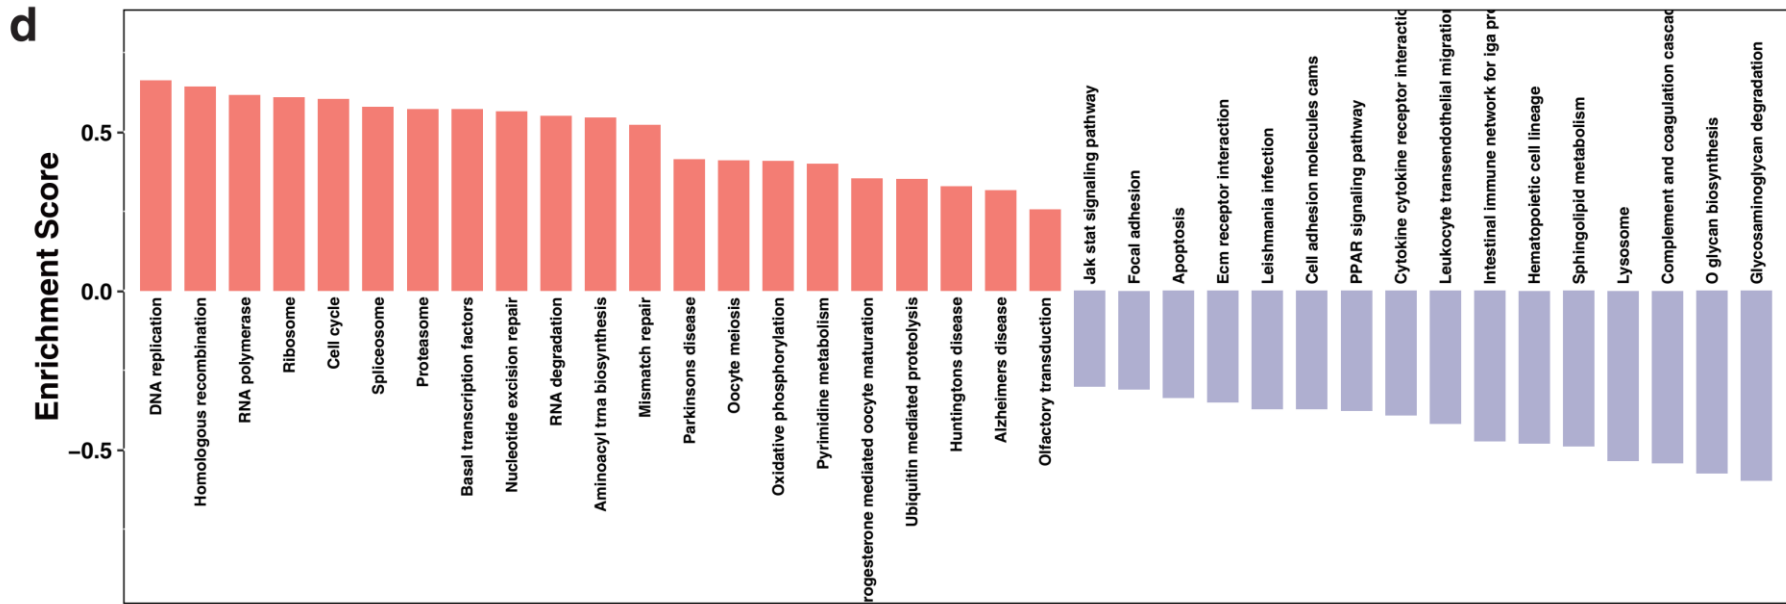

Supplementary Figure 9. a. Correlation matrix between NJLCC mutational signatures and the abundance of TILs. \*\*\*:  $P < 0.001$ ; \*\*:  $P < 0.01$ ; \*:  $P < 0.05$ ; b. The distribution of enrichment scores in GSEA analysis with Th1, Th2, Th17 and Treg cell-specific gene sets; c. Association between the TIL abundance and NSCLC histology; d. The GSEA analysis revealed that genes positively correlated with MS2 were enriched in DNA replication and damage response pathways.

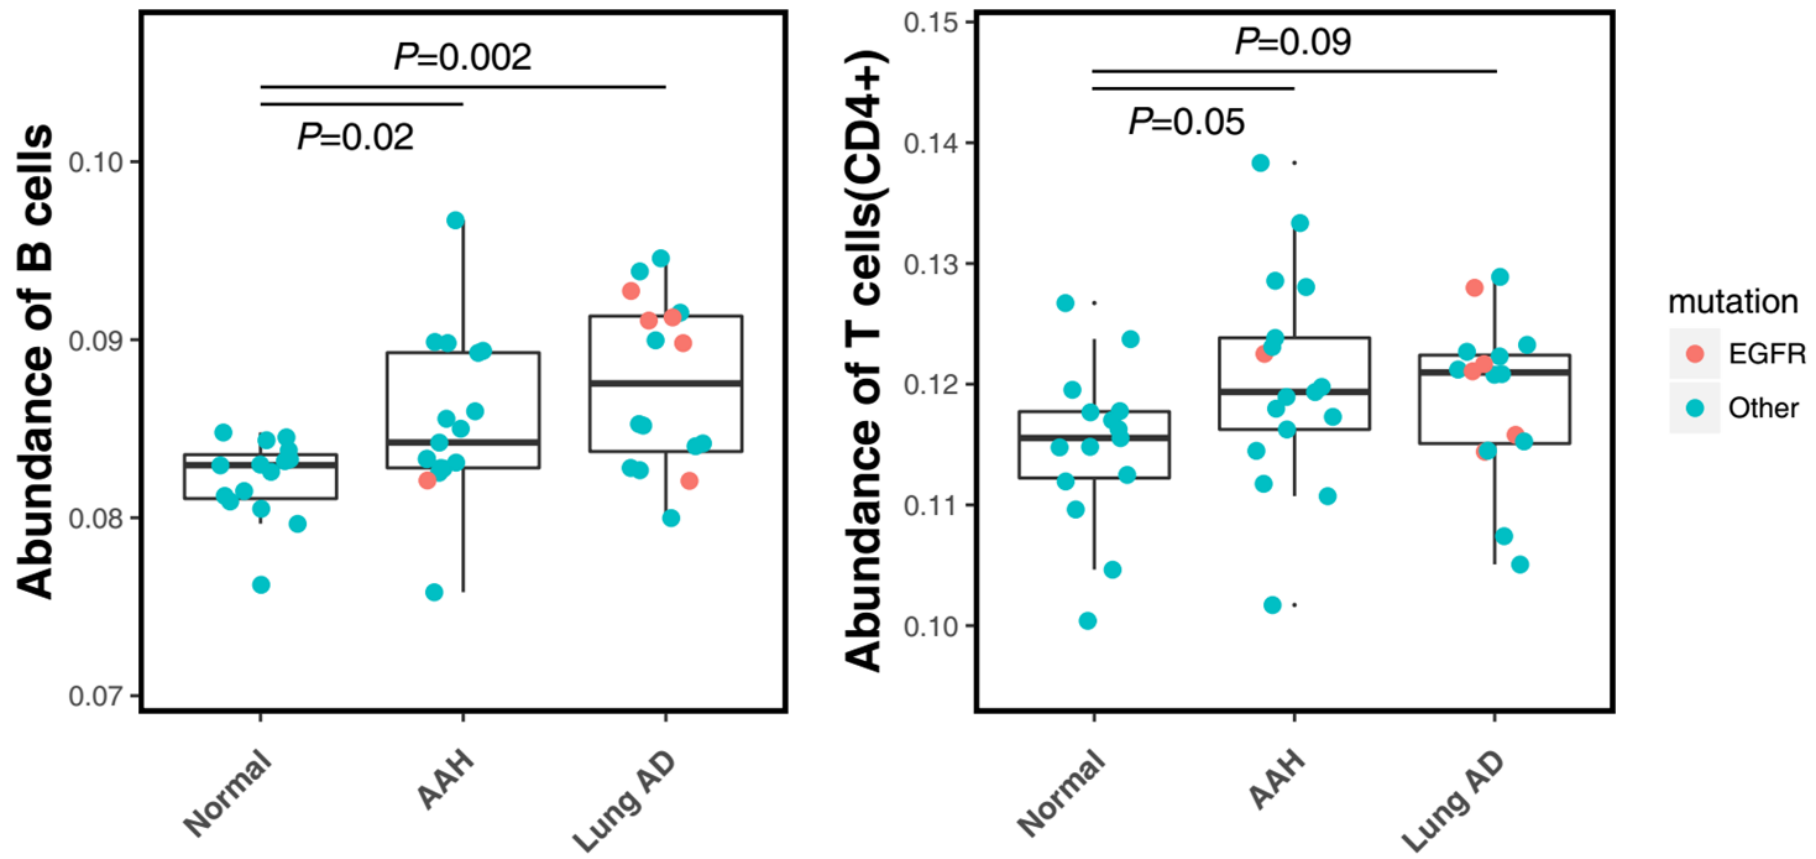

Supplementary Figure 10. Abundance of B cells and T cells (CD4+) in normal, AAH (atypical adenomatous hyperplasia) and Lung AD. Samples with *EGFR* mutations were colored as red.

## Supplementary Tables

Supplementary Table 1. General Description of Samples.

|                     | NJLCC WGS               |                         | NJLCC WES               |                         | TCGA WGS                |                         | TCGA WES                |                         |
|---------------------|-------------------------|-------------------------|-------------------------|-------------------------|-------------------------|-------------------------|-------------------------|-------------------------|
|                     | Lung AD<br>(n=57)       | Lung SCC<br>(n=35)      | Lung AD<br>(n=27)       | Lung SCC<br>(n=30)      | Lung AD<br>(n=50)       | Lung SCC<br>(n=50)      | Lung AD<br>(n=478)      | Lung SCC<br>(n=176)     |
| Age (median; range) | 60.0<br>(34.0-<br>77.0) | 63.0<br>(37.0-<br>75.0) | 59.0<br>(32.5-<br>75.3) | 60.9<br>(46.9-<br>75.0) | 66.0<br>(41.0-<br>82.0) | 68.0<br>(47.0-<br>83.0) | 67.0<br>(38.0-<br>88.0) | 68.0<br>(40.0-<br>85.0) |
| Gender              |                         |                         |                         |                         |                         |                         |                         |                         |
| Male                | 32 (56.1)               | 32 (91.4)               | 13 (48.1)               | 30 (100)                | 24 (48.0)               | 38 (76.0)               | 221 (46.2)              | 130 (73.9)              |
| Female              | 25 (43.9)               | 3 (8.6)                 | 14 (51.9)               | 0 (0)                   | 26 (52.0)               | 12 (24.0)               | 257 (53.8)              | 46 (26.1)               |
| N/A                 | n/a                     | n/a                     | n/a                     | n/a                     | n/a                     | n/a                     | n/a                     | n/a                     |
| Smoking History     |                         |                         |                         |                         |                         |                         |                         |                         |
| Ever smoker         | 21 (36.8)               | 29 (82.9)               | 8 (29.6)                | 22 (73.3)               | 31 (62.0)               | 48 (96.0)               | 394 (82.4)              | 165(93.8)               |
| Lifelong non-smoker | 36 (63.2)               | 6 (17.1)                | 17 (63.0)               | 5 (16.7)                | 16 (32.0)               | 1 (2.0)                 | 70 (14.6)               | 6 (3.4)                 |
| N/A                 | n/a                     | n/a                     | 2 (7.4)                 | 3 (10.0)                | 3 (6.0)                 | 1 (2.0)                 | 14 (2.9)                | 5 (2.8)                 |
| Stage               |                         |                         |                         |                         |                         |                         |                         |                         |
| I                   | 21 (36.8)               | 12 (34.3)               | 2 (7.4)                 | 3 (10.0)                | 21 (42.0)               | 26 (52.0)               | 259 (54.2)              | 97(55.1)                |
| II                  | 16 (28.1)               | 16 (45.7)               | 8 (29.6)                | 14 (46.7)               | 13 (26.0)               | 13 (26.0)               | 113 (23.6)              | 40 (22.7)               |
| III-IV              | 20 (35.1)               | 7 (20.0)                | 17 (63.0)               | 13 (43.3)               | 16 (32.0)               | 11 (22.0)               | 104 (21.8)              | 39 (22.2)               |
| N/A                 | n/a                     | n/a                     | n/a                     | n/a                     | n/a                     | n/a                     | 2(0.4)                  | n/a                     |

WGS: whole genome sequencing; WES: whole exome sequencing; Lung AD: lung adenocarcinoma; Lung SCC: lung squamous cell carcinoma.

Supplementary Table 2. Significantly mutated protein-coding genes identified in NSCLC.

| SYMBOL          | SIGNALS* | SIGNAL<br>COUNT | MUT<br>SAMPLES | OncodriveCLUST |                 | OncodriveFM |                 | MutSigCV |                 |
|-----------------|----------|-----------------|----------------|----------------|-----------------|-------------|-----------------|----------|-----------------|
|                 |          |                 |                | p-value        | q-value         | p-value     | q-value         | p-value  | q-value         |
| <b>EGFR</b>     | CFR      | 3               | 48             | 1.41E-03       | <b>5.63E-03</b> | 0.00E+00    | <b>0.00E+00</b> | 2.05E-08 | <b>9.66E-05</b> |
| <b>PTEN</b>     | CFR      | 3               | 7              | 1.10E-02       | <b>2.93E-02</b> | 2.15E-10    | <b>8.18E-08</b> | 1.43E-05 | <b>2.70E-02</b> |
| <b>TP53</b>     | FR       | 2               | 91             | 5.53E-02       | 8.85E-02        | 0.00E+00    | <b>0.00E+00</b> | 0.00E+00 | <b>0.00E+00</b> |
| <b>NFE2L2</b>   | FR       | 2               | 18             | 5.28E-02       | 8.85E-02        | 0.00E+00    | <b>0.00E+00</b> | 1.06E-12 | <b>6.68E-09</b> |
| <b>RB1</b>      | FR       | 2               | 19             |                |                 | 0.00E+00    | <b>0.00E+00</b> | 3.69E-08 | <b>1.39E-04</b> |
| <b>CDKN2A</b>   | FR       | 2               | 18             |                |                 | 4.33E-15    | <b>2.63E-12</b> | 0.00E+00 | <b>0.00E+00</b> |
| <b>KRAS</b>     | CF       | 2               | 7              | 8.74E-08       | <b>6.99E-07</b> | 3.26E-06    | <b>9.91E-04</b> | 4.65E-04 | 3.56E-01        |
| <b>KMT2D</b>    | F        | 1               | 23             |                |                 | 2.91E-11    | <b>1.48E-08</b> | 1.33E-04 | 1.40E-01        |
| <b>STK11</b>    | R        | 1               | 8              |                |                 | 1.10E-01    | 5.98E-01        | 1.02E-05 | <b>2.13E-02</b> |
| TET2            | F        | 1               | 7              |                |                 | 4.36E-04    | <b>4.29E-02</b> | 6.46E-01 | 1.00E+00        |
| <b>FBXW7</b>    | F        | 1               | 6              |                |                 | 7.22E-11    | <b>3.14E-08</b> | 2.36E-03 | 9.89E-01        |
| <b>ARID1A</b>   | F        | 1               | 5              |                |                 | 9.71E-08    | <b>3.28E-05</b> | 1.97E-02 | 1.00E+00        |
| <b>SETD2</b>    | F        | 1               | 5              |                |                 | 1.11E-04    | <b>1.69E-02</b> | 8.78E-01 | 1.00E+00        |
| <b>PBRM1</b>    | F        | 1               | 3              |                |                 | 4.51E-04    | <b>4.29E-02</b> | 1.88E-01 | 1.00E+00        |
| FLNC            | F        | 1               | 7              |                |                 | 1.60E-04    | <b>2.21E-02</b> | 4.82E-01 | 1.00E+00        |
| <b>ARHGAP35</b> | F        | 1               | 7              |                |                 | 3.67E-05    | <b>8.60E-03</b> | 4.84E-01 | 1.00E+00        |
| <b>CLASP2</b>   | F        | 1               | 7              |                |                 | 1.43E-04    | <b>2.06E-02</b> | 9.98E-01 | 1.00E+00        |
| WNK1            | F        | 1               | 5              |                |                 | 1.66E-05    | <b>4.21E-03</b> | 9.62E-01 | 1.00E+00        |
| AGAP1           | F        | 1               | 5              |                |                 | 7.81E-05    | <b>1.41E-02</b> | 3.65E-01 | 1.00E+00        |
| POLE            | F        | 1               | 5              |                |                 | 3.74E-04    | <b>4.06E-02</b> | 3.36E-02 | 1.00E+00        |
| OBSL1           | F        | 1               | 4              |                |                 | 5.54E-05    | <b>1.20E-02</b> | 5.41E-01 | 1.00E+00        |
| TDG             | F        | 1               | 4              |                |                 | 7.90E-05    | <b>1.41E-02</b> | 4.13E-03 | 1.00E+00        |
| SEMA6B          | F        | 1               | 4              |                |                 | 4.44E-04    | <b>4.29E-02</b> | 2.94E-02 | 1.00E+00        |

|       |   |   |   |          |                 |          |          |
|-------|---|---|---|----------|-----------------|----------|----------|
| ITGAL | F | 1 | 3 | 9.63E-05 | <b>1.54E-02</b> | 3.14E-01 | 1.00E+00 |
| EEF1D | F | 1 | 3 | 2.76E-04 | <b>3.22E-02</b> | 6.95E-02 | 1.00E+00 |
| NT5E  | F | 1 | 3 | 8.45E-06 | <b>2.34E-03</b> | 1.30E-01 | 1.00E+00 |
| PFKM  | F | 1 | 3 | 2.18E-04 | <b>2.88E-02</b> | 4.37E-01 | 1.00E+00 |

\*: C, OncodriveCLUST; F, OncodriveFM; R, Recurrent

**Bold:** potential driver genes

Supplementary Table 3. Significantly mutated protein-coding genes identified in lung adenocarcinoma.

| SYMBOL         | SIGNALS* | SIGNAL<br>COUNT | MUT<br>SAMPLES | OncodriveCLUST |                 | OncodriveFM |                 | MutSigCV |                 |
|----------------|----------|-----------------|----------------|----------------|-----------------|-------------|-----------------|----------|-----------------|
|                |          |                 |                | p-value        | q-value         | p-value     | q-value         | p-value  | q-value         |
| <b>EGFR</b>    | CFR      | 3               | 44             | 5.12E-04       | <b>7.68E-04</b> | 0.00E+00    | <b>0.00E+00</b> | 3.11E-15 | <b>2.93E-11</b> |
| <b>TP53</b>    | FR       | 2               | 41             | 3.21E-01       | 3.21E-01        | 0.00E+00    | <b>0.00E+00</b> | 7.77E-16 | <b>1.47E-11</b> |
| <b>RB1</b>     | FR       | 2               | 13             |                |                 | 2.03E-13    | <b>6.82E-11</b> | 6.00E-15 | <b>3.77E-11</b> |
| <b>KRAS</b>    | CF       | 2               | 7              | 8.74E-08       | <b>2.62E-07</b> | 5.04E-06    | <b>1.27E-03</b> | 1.38E-04 | 4.34E-01        |
| <b>SMARCA4</b> | F        | 1               | 4              |                |                 | 1.13E-04    | <b>1.28E-02</b> | 2.81E-01 | 1.00E+00        |
| <b>SETD2</b>   | F        | 1               | 3              |                |                 | 9.29E-05    | <b>1.28E-02</b> | 7.87E-01 | 1.00E+00        |
| WNK1           | F        | 1               | 4              |                |                 | 9.08E-05    | <b>1.28E-02</b> | 9.90E-01 | 1.00E+00        |
| EPRS           | F        | 1               | 4              |                |                 | 3.89E-04    | <b>3.93E-02</b> | 9.67E-01 | 1.00E+00        |
| TDG            | F        | 1               | 3              |                |                 | 1.14E-04    | <b>1.28E-02</b> | 1.42E-03 | 1.00E+00        |

\*: C, OncodriveCLUST; F, OncodriveFM; R, Recurrent

**Bold:** potential driver genes

Supplementary Table 4. Significantly mutated protein-coding genes identified in lung squamous cell carcinoma.

| SYMBOL        | SIGNALS* | SIGNAL<br>COUNT | MUT<br>SAMPLES | OncodriveCLUST |                 | OncodriveFM |                 | MutSigCV |                 |
|---------------|----------|-----------------|----------------|----------------|-----------------|-------------|-----------------|----------|-----------------|
|               |          |                 |                | p-value        | q-value         | p-value     | q-value         | p-value  | q-value         |
| <b>TP53</b>   | CFR      | 3               | 51             | 3.82E-03       | <b>1.15E-02</b> | 0.00E+00    | <b>0.00E+00</b> | 1.11E-16 | <b>2.09E-12</b> |
| <b>NFE2L2</b> | FR       | 2               | 18             | 5.28E-02       | 7.92E-02        | 0.00E+00    | <b>0.00E+00</b> | 7.48E-14 | <b>4.70E-10</b> |
| <b>KMT2D</b>  | FR       | 2               | 20             |                |                 | 4.06E-12    | <b>2.30E-09</b> | 3.81E-07 | <b>1.20E-03</b> |
| <b>CDKN2A</b> | FR       | 2               | 14             |                |                 | 3.32E-11    | <b>9.91E-09</b> | 1.37E-14 | <b>1.29E-10</b> |
| <b>FBXW7</b>  | F        | 1               | 6              |                |                 | 6.74E-11    | <b>1.64E-08</b> | 3.95E-04 | 4.38E-01        |
| <b>RB1</b>    | F        | 1               | 5              |                |                 | 5.45E-08    | <b>1.16E-05</b> | 2.36E-01 | 1.00E+00        |
| TET2          | F        | 1               | 5              |                |                 | 2.22E-04    | <b>2.70E-02</b> | 1.28E-01 | 1.00E+00        |
| <b>PTEN</b>   | F        | 1               | 5              |                |                 | 5.53E-12    | <b>2.35E-09</b> | 2.54E-04 | 3.68E-01        |
| <b>ARID1A</b> | F        | 1               | 4              |                |                 | 1.18E-06    | <b>2.24E-04</b> | 5.65E-02 | 1.00E+00        |
| <b>PBRM1</b>  | F        | 1               | 2              |                |                 | 4.63E-04    | <b>4.15E-02</b> | 3.59E-01 | 1.00E+00        |
| <b>FAT1</b>   | F        | 1               | 12             |                |                 | 3.49E-11    | <b>9.91E-09</b> | 3.84E-01 | 1.00E+00        |
| <b>SVEP1</b>  | F        | 1               | 6              |                |                 | 1.15E-04    | <b>1.50E-02</b> | 9.97E-01 | 1.00E+00        |
| AGAP1         | F        | 1               | 4              |                |                 | 2.81E-05    | <b>4.78E-03</b> | 3.96E-01 | 1.00E+00        |
| SEMA6B        | F        | 1               | 4              |                |                 | 4.06E-04    | <b>4.06E-02</b> | 1.73E-02 | 1.00E+00        |
| ITGAL         | F        | 1               | 3              |                |                 | 7.22E-05    | <b>1.02E-02</b> | 1.44E-01 | 1.00E+00        |
| EEF1D         | F        | 1               | 3              |                |                 | 2.91E-04    | 3.31E-02        | 5.12E-02 | <b>1.00E+00</b> |

\*: C, OncodriveCLUST; F, OncodriveFM; R, Recurrent

**Bold:** potential driver genes

Supplementary Table 5. Copy number alterations identified in NSCLC patients.

| Unique Name           | Descriptor | Wide Peak Limits         | q values | Residual q values | Number of genes in peak | Number of microRNAs in peak | Top candidate genes in wide peak |
|-----------------------|------------|--------------------------|----------|-------------------|-------------------------|-----------------------------|----------------------------------|
| Amplification Peak 1  | 3q27.1     | chr3:176696138-183772886 | 1.63E-10 | 1.63E-10          | 52                      | 1                           | SOX2/PIK3CA                      |
| Amplification Peak 2  | 5p15.33    | chr5:1-2888978           | 5.56E-04 | 5.56E-04          | 29                      | 4                           | TERT                             |
| Amplification Peak 3  | 7p11.2     | chr7:54651541-55777338   | 7.74E-09 | 7.74E-09          | 6                       | 0                           | EGFR                             |
| Amplification Peak 4  | 8p11.23    | chr8:37416926-41158567   | 1.43E-03 | 1.43E-03          | 37                      | 1                           | WHSC1L1/FGFR1                    |
| Amplification Peak 5  | 8q24.21    | chr8:121797717-131083276 | 1.32E-02 | 1.32E-02          | 52                      | 8                           | MYC                              |
| Amplification Peak 6  | 11q13.3    | chr11:68826017-70332830  | 2.00E-03 | 2.00E-03          | 12                      | 2                           | CCND1                            |
| Amplification Peak 7  | 12q15      | chr12:65956377-71305401  | 1.01E-03 | 1.01E-03          | 37                      | 0                           | MDM2                             |
| Amplification Peak 8  | 14q13.3    | chr14:34539603-39441768  | 3.89E-03 | 3.89E-03          | 35                      | 1                           | NKX2-1                           |
| Amplification Peak 9  | 19q13.2    | chr19:33045997-41936165  | 1.55E-01 | 1.55E-01          | 243                     | 3                           |                                  |
| Amplification Peak 10 | 20q13.31   | chr20:55285104-63025520  | 1.84E-03 | 1.84E-03          | 101                     | 14                          |                                  |
| Deletion Peak 1       | 1p36.12    | chr1:1-243527304         | 9.14E-02 | 2.06E-01          | 2302                    | 105                         |                                  |
| Deletion Peak 2       | 1p13.3     | chr1:60530721-146016270  | 2.67E-02 | 7.45E-02          | 429                     | 14                          |                                  |
| Deletion Peak 3       | 2q36.2     | chr2:205814436-243199373 | 2.02E-02 | 2.02E-02          | 310                     | 23                          |                                  |
| Deletion Peak 4       | 3p21.31    | chr3:1-93518806          | 2.20E-02 | 2.20E-02          | 608                     | 34                          | FOXP1/ROBO1                      |
| Deletion Peak 5       | 4q35.1     | chr4:159596781-191154276 | 2.38E-03 | 2.38E-03          | 130                     | 6                           | FAT1                             |
| Deletion Peak 6       | 5q12.3     | chr5:44966169-180915260  | 1.36E-01 | 1.33E-01          | 855                     | 50                          |                                  |
| Deletion Peak 7       | 6p21.32    | chr6:1-171115067         | 4.85E-02 | 4.85E-02          | 1209                    | 52                          | HLA region                       |



|                  |          |                          |          |          |      |    |        |
|------------------|----------|--------------------------|----------|----------|------|----|--------|
| Deletion Peak 8  | 8p22     | chr8:1-35271733          | 1.93E-05 | 1.93E-05 | 248  | 16 |        |
| Deletion Peak 9  | 9p21.3   | chr9:21692249-22534262   | 1.47E-15 | 1.47E-15 | 6    | 0  | CDKN2A |
| Deletion Peak 10 | 9p13.1   | chr9:35003901-69735668   | 9.14E-02 | 9.14E-02 | 112  | 6  |        |
| Deletion Peak 11 | 10q24.31 | chr10:77154012-135534747 | 4.45E-02 | 4.45E-02 | 444  | 26 | PTEN   |
| Deletion Peak 12 | 12q24.31 | chr12:76150197-133851895 | 3.69E-02 | 3.69E-02 | 443  | 26 |        |
| Deletion Peak 13 | 13q12.11 | chr13:1-51828668         | 1.52E-04 | 1.52E-04 | 271  | 8  |        |
| Deletion Peak 14 | 15q13.3  | chr15:1-46162478         | 1.17E-01 | 1.20E-01 | 270  | 11 |        |
| Deletion Peak 15 | 16q23.3  | chr16:70201428-90354753  | 1.55E-02 | 1.55E-02 | 201  | 7  |        |
| Deletion Peak 16 | 17p11.2  | chr17:1-25650608         | 5.94E-02 | 5.94E-02 | 396  | 18 | USP22  |
| Deletion Peak 17 | 18q21.32 | chr18:35234114-78077248  | 3.99E-02 | 3.99E-02 | 172  | 10 | SMAD4  |
| Deletion Peak 18 | 19p13.3  | chr19:1-3940726          | 1.93E-05 | 2.07E-04 | 132  | 5  |        |
| Deletion Peak 19 | 19p13.2  | chr19:1-32288846         | 3.62E-03 | 2.06E-01 | 662  | 28 |        |
| Deletion Peak 20 | 19q13.42 | chr19:11678462-59128983  | 1.90E-01 | 1.90E-01 | 1153 | 75 |        |

---

Supplementary Table 6. Partial correlation between TIL abundance and MS3 proportion adjusting for histology of NSCLC.

| TIL type       | Spearman rank correlation |          |       | Spearman partial correlation* |          |
|----------------|---------------------------|----------|-------|-------------------------------|----------|
|                | r                         | <i>P</i> | FDR q | r                             | <i>P</i> |
| B cell         | 0.34                      | 0.00     | 0.01  | 0.21                          | 0.05     |
| CD4+ T cell    | 0.30                      | 0.00     | 0.01  | 0.16                          | 0.14     |
| CD8+ T cell    | -0.12                     | 0.27     | 0.32  | -0.16                         | 0.12     |
| Neutrophil     | 0.03                      | 0.81     | 0.81  | -0.18                         | 0.09     |
| Macrophage     | 0.23                      | 0.03     | 0.05  | 0.07                          | 0.54     |
| Dendritic cell | 0.22                      | 0.04     | 0.05  | 0.04                          | 0.70     |

\*: adjusting for histology of NSCLC

Supplementary Table 7. Clinical information and TIL abundance of 90 NSCLC patients.

| SampleID   | Age | Gender | Smoking history | Histology | Chemoradiotherapy | Targeted therapy | B cell | T cell (CD4) | T cell (CD8) | N*   | M*   | DC*  |
|------------|-----|--------|-----------------|-----------|-------------------|------------------|--------|--------------|--------------|------|------|------|
| NJLCC_0001 | 71  | Male   | Ever-Smoker     | Lung SCC  | chemotherapy      | No               | 0.00   | 0.18         | 0.11         | 0.09 | 0.05 | 0.49 |
| NJLCC_0003 | 70  | Male   | Ever-Smoker     | Lung SCC  | None              | No               | 0.03   | 0.24         | 0.00         | 0.10 | 0.02 | 0.37 |
| NJLCC_0004 | 71  | Male   | Ever-Smoker     | Lung SCC  | None              | No               | 0.11   | 0.09         | 0.21         | 0.15 | 0.00 | 0.35 |
| NJLCC_0005 | 71  | Male   | Ever-Smoker     | Lung SCC  | chemotherapy      | No               | 0.10   | 0.07         | 0.34         | 0.15 | 0.09 | 0.51 |
| NJLCC_0008 | 58  | Male   | Ever-Smoker     | Lung AD   | chemotherapy      | No               | 0.00   | 0.17         | 0.19         | 0.13 | 0.25 | 0.85 |
| NJLCC_0009 | 59  | Male   | Never-Smoker    | Lung AD   | chemotherapy      | No               | 0.05   | 0.24         | 0.07         | 0.10 | 0.08 | 0.47 |
| NJLCC_0010 | 51  | Male   | Ever-Smoker     | Lung AD   | chemoradiotherapy | No               | 0.00   | 0.11         | 0.22         | 0.14 | 0.08 | 0.58 |
| NJLCC_0012 | 67  | Female | Never-Smoker    | Lung AD   | chemotherapy      | No               | 0.00   | 0.50         | 0.01         | 0.13 | 0.29 | 0.70 |
| NJLCC_0013 | 72  | Female | Never-Smoker    | Lung AD   | chemoradiotherapy | No               | 0.17   | 0.29         | 0.24         | 0.13 | 0.24 | 0.56 |
| NJLCC_0014 | 60  | Male   | Ever-Smoker     | Lung AD   | None              | No               | 0.11   | 0.28         | 0.20         | 0.18 | 0.03 | 0.80 |
| NJLCC_0015 | 57  | Male   | Ever-Smoker     | Lung AD   | chemotherapy      | Yes              | 0.07   | 0.09         | 0.13         | 0.08 | 0.17 | 0.48 |
| NJLCC_0016 | 73  | Male   | Never-Smoker    | Lung AD   | chemotherapy      | No               | 0.07   | 0.36         | 0.03         | 0.07 | 0.10 | 0.57 |
| NJLCC_0017 | 58  | Female | Never-Smoker    | Lung AD   | chemoradiotherapy | No               | 0.03   | 0.02         | 0.50         | 0.21 | 0.10 | 0.73 |
| NJLCC_0018 | 59  | Female | Never-Smoker    | Lung AD   | None              | Yes              | 0.26   | 0.20         | 0.14         | 0.07 | 0.01 | 0.56 |
| NJLCC_0019 | 60  | Female | Never-Smoker    | Lung AD   | None              | No               | 0.12   | 0.07         | 0.10         | 0.05 | 0.04 | 0.31 |
| NJLCC_0020 | 54  | Male   | Ever-Smoker     | Lung AD   | chemotherapy      | Yes              | 0.12   | 0.14         | 0.11         | 0.14 | 0.12 | 0.62 |
| NJLCC_0021 | 64  | Male   | Ever-Smoker     | Lung AD   | chemotherapy      | No               | 0.20   | 0.22         | 0.06         | 0.05 | 0.03 | 0.37 |
| NJLCC_0022 | 75  | Male   | Ever-Smoker     | Lung AD   | None              | No               | 0.12   | 0.31         | 0.25         | 0.23 | 0.11 | 0.92 |
| NJLCC_0023 | 65  | Female | Never-Smoker    | Lung AD   | None              | Yes              | 0.23   | 0.10         | 0.18         | 0.14 | 0.11 | 0.33 |
| NJLCC_0024 | 73  | Male   | Ever-Smoker     | Lung AD   | None              | No               | 0.19   | 0.26         | 0.22         | 0.12 | 0.00 | 0.64 |
| NJLCC_0025 | 65  | Male   | Never-Smoker    | Lung AD   | chemoradiotherapy | No               | 0.14   | 0.15         | 0.09         | 0.20 | 0.11 | 0.74 |
| NJLCC_0026 | 64  | Male   | Ever-Smoker     | Lung AD   | chemotherapy      | No               | 0.11   | 0.06         | 0.20         | 0.21 | 0.00 | 0.45 |
| NJLCC_0027 | 63  | Male   | Ever-Smoker     | Lung SCC  | chemotherapy      | No               | 0.06   | 0.06         | 0.17         | 0.07 | 0.08 | 0.30 |

|            |    |        |              |          |                   |    |      |      |      |      |      |      |
|------------|----|--------|--------------|----------|-------------------|----|------|------|------|------|------|------|
| NJLCC_0028 | 57 | Male   | Never-Smoker | Lung AD  | None              | No | 0.09 | 0.06 | 0.16 | 0.07 | 0.04 | 0.27 |
| NJLCC_0029 | 77 | Male   | Never-Smoker | Lung AD  | chemotherapy      | No | 0.13 | 0.14 | 0.13 | 0.07 | 0.14 | 0.28 |
| NJLCC_0030 | 50 | Male   | Ever-Smoker  | Lung SCC | None              | No | 0.04 | 0.08 | 0.09 | 0.04 | 0.00 | 0.28 |
| NJLCC_0031 | 44 | Female | Never-Smoker | Lung AD  | chemoradiotherapy | No | 0.20 | 0.45 | 0.30 | 0.20 | 0.00 | 0.96 |
| NJLCC_0032 | 59 | Female | Never-Smoker | Lung AD  | chemotherapy      | No | 0.07 | 0.20 | 0.13 | 0.09 | 0.06 | 0.30 |
| NJLCC_0033 | 59 | Female | Never-Smoker | Lung SCC | chemoradiotherapy | No | 0.09 | 0.03 | 0.22 | 0.07 | 0.00 | 0.31 |
| NJLCC_0034 | 67 | Male   | Ever-Smoker  | Lung SCC | None              | No | 0.10 | 0.07 | 0.35 | 0.07 | 0.03 | 0.40 |
| NJLCC_0035 | 73 | Male   | Ever-Smoker  | Lung SCC | None              | No | 0.09 | 0.07 | 0.18 | 0.06 | 0.03 | 0.37 |
| NJLCC_0036 | 65 | Male   | Ever-Smoker  | Lung AD  | None              | No | 0.02 | 0.31 | 0.12 | 0.14 | 0.49 | 0.31 |
| NJLCC_0037 | 54 | Male   | Ever-Smoker  | Lung SCC | None              | No | 0.06 | 0.08 | 0.08 | 0.04 | 0.00 | 0.25 |
| NJLCC_0038 | 66 | Male   | Ever-Smoker  | Lung AD  | chemotherapy      | No | 0.16 | 0.14 | 0.13 | 0.08 | 0.17 | 0.42 |
| NJLCC_0039 | 63 | Male   | Ever-Smoker  | Lung AD  | None              | No | 0.10 | 0.05 | 0.34 | 0.14 | 0.14 | 0.56 |
| NJLCC_0041 | 55 | Male   | Ever-Smoker  | Lung AD  | chemotherapy      | No | 0.05 | 0.26 | 0.07 | 0.20 | 0.00 | 0.40 |
| NJLCC_0042 | 63 | Female | Never-Smoker | Lung AD  | None              | No | 0.19 | 0.16 | 0.24 | 0.09 | 0.00 | 0.64 |
| NJLCC_0043 | 59 | Male   | Ever-Smoker  | Lung SCC | chemotherapy      | No | 0.07 | 0.08 | 0.12 | 0.05 | 0.09 | 0.41 |
| NJLCC_0044 | 52 | Male   | Ever-Smoker  | Lung SCC | None              | No | 0.28 | 0.26 | 0.30 | 0.09 | 0.00 | 0.38 |
| NJLCC_0045 | 65 | Female | Never-Smoker | Lung AD  | None              | No | 0.15 | 0.21 | 0.25 | 0.07 | 0.33 | 0.51 |
| NJLCC_0047 | 68 | Male   | Never-Smoker | Lung AD  | None              | No | 0.09 | 0.00 | 0.40 | 0.12 | 0.17 | 0.65 |
| NJLCC_0048 | 51 | Female | Never-Smoker | Lung AD  | chemotherapy      | No | 0.12 | 0.04 | 0.28 | 0.10 | 0.06 | 0.52 |
| NJLCC_0049 | 65 | Male   | Ever-Smoker  | Lung AD  | chemotherapy      | No | 0.14 | 0.05 | 0.23 | 0.10 | 0.00 | 0.37 |
| NJLCC_0050 | 50 | Male   | Never-Smoker | Lung AD  | chemotherapy      | No | 0.18 | 0.01 | 0.51 | 0.14 | 0.03 | 0.60 |
| NJLCC_0051 | 72 | Male   | Ever-Smoker  | Lung SCC | None              | No | 0.16 | 0.00 | 0.21 | 0.19 | 0.00 | 0.43 |
| NJLCC_0052 | 74 | Male   | Ever-Smoker  | Lung SCC | chemotherapy      | No | 0.15 | 0.13 | 0.17 | 0.04 | 0.00 | 0.38 |
| NJLCC_0053 | 62 | Male   | Ever-Smoker  | Lung SCC | None              | No | 0.03 | 0.00 | 0.17 | 0.06 | 0.00 | 0.36 |
| NJLCC_0054 | 67 | Male   | Ever-Smoker  | Lung SCC | chemoradiotherapy | No | 0.07 | 0.03 | 0.19 | 0.09 | 0.00 | 0.41 |
| NJLCC_0055 | 51 | Male   | Ever-Smoker  | Lung SCC | chemoradiotherapy | No | 0.07 | 0.04 | 0.12 | 0.02 | 0.00 | 0.34 |

|            |    |        |              |          |              |     |      |      |      |      |      |      |
|------------|----|--------|--------------|----------|--------------|-----|------|------|------|------|------|------|
| NJLCC_0057 | 64 | Male   | Never-Smoker | Lung AD  | None         | No  | 0.16 | 0.08 | 0.17 | 0.09 | 0.05 | 0.56 |
| NJLCC_0058 | 62 | Male   | Ever-Smoker  | Lung AD  | None         | No  | 0.06 | 0.05 | 0.14 | 0.06 | 0.04 | 0.29 |
| NJLCC_0059 | 34 | Female | Never-Smoker | Lung AD  | chemotherapy | No  | 0.18 | 0.04 | 0.25 | 0.06 | 0.05 | 0.38 |
| NJLCC_0060 | 43 | Male   | Ever-Smoker  | Lung AD  | chemotherapy | No  | 0.12 | 0.05 | 0.21 | 0.09 | 0.17 | 0.25 |
| NJLCC_0061 | 74 | Female | Never-Smoker | Lung AD  | None         | No  | 0.25 | 0.06 | 0.43 | 0.16 | 0.00 | 0.87 |
| NJLCC_0062 | 50 | Female | Never-Smoker | Lung AD  | chemotherapy | No  | 0.14 | 0.09 | 0.23 | 0.11 | 0.06 | 0.50 |
| NJLCC_0063 | 58 | Female | Never-Smoker | Lung AD  | chemotherapy | Yes | 0.15 | 0.00 | 0.17 | 0.12 | 0.00 | 0.47 |
| NJLCC_0064 | 66 | Female | Never-Smoker | Lung AD  | None         | No  | 0.00 | 0.00 | 0.42 | 0.29 | 0.33 | 0.75 |
| NJLCC_0065 | 34 | Female | Never-Smoker | Lung AD  | chemotherapy | No  | 0.17 | 0.21 | 0.17 | 0.12 | 0.02 | 0.54 |
| NJLCC_0066 | 50 | Male   | Never-Smoker | Lung AD  | None         | No  | 0.14 | 0.09 | 0.21 | 0.10 | 0.06 | 0.53 |
| NJLCC_0067 | 45 | Male   | Never-Smoker | Lung AD  | None         | No  | 0.16 | 0.11 | 0.10 | 0.12 | 0.11 | 0.50 |
| NJLCC_0068 | 55 | Female | Never-Smoker | Lung AD  | None         | No  | 0.09 | 0.06 | 0.28 | 0.13 | 0.09 | 0.55 |
| NJLCC_0069 | 62 | Male   | Ever-Smoker  | Lung AD  | None         | No  | 0.11 | 0.11 | 0.08 | 0.08 | 0.22 | 0.46 |
| NJLCC_0070 | 57 | Female | Never-Smoker | Lung AD  | chemotherapy | No  | 0.10 | 0.09 | 0.14 | 0.10 | 0.00 | 0.49 |
| NJLCC_0072 | 58 | Male   | Ever-Smoker  | Lung AD  | None         | No  | 0.21 | 0.13 | 0.37 | 0.11 | 0.01 | 0.66 |
| NJLCC_0073 | 63 | Male   | Ever-Smoker  | Lung SCC | chemotherapy | No  | 0.08 | 0.00 | 0.14 | 0.05 | 0.00 | 0.32 |
| NJLCC_0074 | 54 | Male   | Ever-Smoker  | Lung SCC | None         | No  | 0.08 | 0.06 | 0.34 | 0.07 | 0.00 | 0.36 |
| NJLCC_0075 | 63 | Male   | Never-Smoker | Lung SCC | None         | No  | 0.12 | 0.02 | 0.15 | 0.04 | 0.00 | 0.34 |
| NJLCC_0076 | 65 | Male   | Ever-Smoker  | Lung SCC | None         | No  | 0.12 | 0.00 | 0.27 | 0.10 | 0.00 | 0.41 |
| NJLCC_0077 | 59 | Male   | Ever-Smoker  | Lung SCC | chemotherapy | No  | 0.00 | 0.05 | 0.10 | 0.03 | 0.00 | 0.67 |
| NJLCC_0078 | 39 | Male   | Ever-Smoker  | Lung SCC | None         | No  | 0.04 | 0.01 | 0.11 | 0.03 | 0.00 | 0.32 |
| NJLCC_0079 | 69 | Male   | Ever-Smoker  | Lung SCC | None         | No  | 0.08 | 0.05 | 0.34 | 0.17 | 0.03 | 0.49 |
| NJLCC_0080 | 68 | Male   | Ever-Smoker  | Lung SCC | chemotherapy | No  | 0.09 | 0.02 | 0.22 | 0.05 | 0.00 | 0.33 |
| NJLCC_0081 | 64 | Female | Never-Smoker | Lung SCC | chemotherapy | No  | 0.08 | 0.04 | 0.15 | 0.14 | 0.00 | 0.57 |
| NJLCC_0082 | 50 | Male   | Never-Smoker | Lung SCC | chemotherapy | No  | 0.10 | 0.06 | 0.09 | 0.06 | 0.00 | 0.28 |
| NJLCC_0083 | 66 | Male   | Ever-Smoker  | Lung SCC | NA           | No  | 0.07 | 0.03 | 0.12 | 0.05 | 0.00 | 0.27 |

|            |    |        |              |          |                   |    |      |      |      |      |      |      |
|------------|----|--------|--------------|----------|-------------------|----|------|------|------|------|------|------|
| NJLCC_0084 | 58 | Male   | Ever-Smoker  | Lung SCC | chemotherapy      | No | 0.00 | 0.00 | 0.33 | 0.07 | 0.07 | 0.41 |
| NJLCC_0085 | 61 | Male   | Ever-Smoker  | Lung SCC | None              | No | 0.06 | 0.00 | 0.35 | 0.15 | 0.04 | 0.39 |
| NJLCC_0086 | 73 | Male   | Never-Smoker | Lung SCC | NA                | No | 0.19 | 0.04 | 0.25 | 0.06 | 0.07 | 0.35 |
| NJLCC_0087 | 59 | Male   | Ever-Smoker  | Lung SCC | chemotherapy      | No | 0.10 | 0.04 | 0.07 | 0.03 | 0.00 | 0.24 |
| NJLCC_0088 | 64 | Male   | Never-Smoker | Lung SCC | chemotherapy      | No | 0.09 | 0.04 | 0.11 | 0.02 | 0.00 | 0.30 |
| NJLCC_0089 | 51 | Male   | Ever-Smoker  | Lung SCC | chemoradiotherapy | No | 0.08 | 0.00 | 0.33 | 0.04 | 0.00 | 0.41 |
| NJLCC_0090 | 75 | Female | Ever-Smoker  | Lung SCC | None              | No | 0.05 | 0.00 | 0.40 | 0.17 | 0.17 | 0.70 |
| NJLCC_0091 | 69 | Female | Never-Smoker | Lung AD  | chemotherapy      | No | 0.22 | 0.16 | 0.26 | 0.08 | 0.01 | 0.38 |
| NJLCC_0092 | 50 | Female | Never-Smoker | Lung AD  | chemotherapy      | No | 0.26 | 0.33 | 0.39 | 0.09 | 0.00 | 0.69 |
| NJLCC_0093 | 54 | Male   | Never-Smoker | Lung AD  | chemotherapy      | No | 0.20 | 0.00 | 0.44 | 0.07 | 0.00 | 0.46 |
| NJLCC_0094 | 61 | Male   | Ever-Smoker  | Lung AD  | chemotherapy      | No | 0.17 | 0.02 | 0.19 | 0.07 | 0.00 | 0.36 |
| NJLCC_0095 | 68 | Female | Never-Smoker | Lung AD  | NA                | No | 0.03 | 0.16 | 0.26 | 0.10 | 0.08 | 0.86 |
| NJLCC_0096 | 66 | Male   | Ever-Smoker  | Lung AD  | None              | No | 0.17 | 0.00 | 0.78 | 0.23 | 0.21 | 0.92 |
| NJLCC_0097 | 45 | Female | Never-Smoker | Lung AD  | chemotherapy      | No | 0.19 | 0.05 | 0.17 | 0.04 | 0.00 | 0.32 |
| NJLCC_0098 | 62 | Male   | Ever-Smoker  | Lung AD  | None              | No | 0.15 | 0.02 | 0.16 | 0.12 | 0.00 | 0.44 |

\*: N, Neutrophil; M, Macrophage; DC, Dendritic cell

Supplementary Table 8. The primer for the detection of rearrangements in adjacent normal tissues.

| Sample     | Fused gene | Primer 1                                                   | Primer 2                                                      |
|------------|------------|------------------------------------------------------------|---------------------------------------------------------------|
| NJLCC_0067 | EML4-ALK   | Left: TTCTTAGCAGCAACAGGTGG<br>Right: CTCCTGCCCTGTTCCCTAA   | Left: GCCAGTCCTCAATAATTCACCA<br>Right: GGACTGCAGTTTCCCTCTCT   |
| NJLCC_0031 | KIF5B-RET  | Left: ACATTTCAA AATTGGCTCCTGAA<br>Right: CTTCCCTGCCGCTGTAC | Left: AGTCTTCAGTGCCTTAGTTTGC<br>Right: ACAGTCAAGGTCAGTGTCGA   |
| NJLCC_0066 | EZR-ROS1   | Left: CGCGAGAAGGAGGAGTTGAT<br>Right: CCAAAGGTCAGTGGGATTGT  | Left: CGTGGAGAGAGAGAAAGAGCA<br>Right: CAAAGGTCAGTGGGATTGTAACA |
| NJLCC_0059 | CD74-ROS1  | Left: AGGCTGGTCTTGA ACTCCTG<br>Right: TTAGCATGCCAAGACCAACG | Left: CCACCACGCCCAGCTAAT<br>Right: TGATGCATGTGAGTCCTTAACT     |
| NJLCC_0048 | CD63-BCAR4 | Left: ATCATGTTGGTGGAGGTGGC<br>Right: GGTCTCGAACTCCTCACCTC  | Left: GGGCCCCTGTAATGCATAGA<br>Right: ACAGACATAAGCACCCCTTG     |
